# Supplementary material for: A Phase I/II Open-Label Study of Molibresib for the Treatment of Relapsed/Refractory Hematologic Malignancies
Source: Oxford University Press journal article supplement (doi:10.1158/1078-0432.ccr-22-1284), 2022-11-09
Supplement: ccr-22-1284_supplementary_data1_suppts1.docx [file ccr-22-1284_supplementary_data1_suppts1.docx]

## Supplementary Tables

### Supplementary Table S1. Patient baseline demographics and clinical characteristics.

|  | **Part 1 total population (n=87)** | **Part 2 MDS cohort  (n=16)** | **Part 2 CTCL cohort  [60 mg QD] (n=7)** | **Part 2 CTCL cohort  [80 mg QD] (n=1)** | **Part 2 total population (n=24)** | **Total study population (N=111)** |
| --- | --- | --- | --- | --- | --- | --- |
| **Age (years), mean (SD)** | 61.1 (13.9) | 72.4 (8.0) | 65.0 (11.8) | 71.0 (0) | 70.2 (9.5) | 63.0 (13.6) |
| **Female, n (%)** | 33 (38) | 6 (38) | 5 (71) | 1 (100) | 12 (50) | 45 (41) |
| **BMI (kg/m2), mean (SD)** | n=86  27.0 (5.8) | n=15  26.1 (5.0) | n=7  27.3 (6.6) | n=1  23.1 (0) | n=23  26.4 (5.3) | n=109  26.8 (5.7) |
| **Height (cm), mean (SD)** | n=86  167.6 (11.2) | n=15  168.1 (10.2) | n=7  161.1 (8.4) | n=1  160 (0) | n=23  165.6 (9.9) | n=109  167 (10.9) |
| **Weight (kg), mean (SD)** | 75.9 (19.8) | 75.1 (15.9) | 71.4 (19.4) | 59.0 (0) | 73.4 (16.6) | 75.4 (19.1) |
| **Ethnicity, n (%)**  Hispanic or Latino  Not Hispanic or Latino | 7 (8)  80 (92) | 2 (13)  14 (88) | 1 (14)  6 (86) | 0  1 (100) | 3 (13)  21 (88) | 10 (9)  101 (91) |
| **Race, n (%)**  African American / African  Asian  White (Caucasian)  Other | n=84  4 (5)  10 (12)  68 (81)  2 (2) | n=16  1 (6)  0  15 (94)  0 | n=6  0  1 (17)  5 (83)  0 | n=1  0  0  1 (100)  0 | n=23  1 (4)  1 (4)  21 (91)  0 | n=107  5 (5)  11 (10)  89 (83)  2 (2) |
| **ECOG performance status, n (%)**  0  1  2 | 21 (24)  58 (67)  8 (9) | 3 (19)  12 (75)  1 (6) | 2 (29)  4 (57)  1 (14) | 0  1 (100)  0 | 5 (21)  17 (71)  2 (8) | 26 (23)  75 (68)  10 (9) |
| **Time since diagnosis (days), mean (SD)** | 998.6 (1188.1) | 545.6 (815.0) | 1468.0 (1055.9) | 1440.0  (–) | 851.9  (959.1) | 966.9 (1140.0) |
| **Time since progression (days), mean (SD)** | n=59  129.2  (154.6) | n=3  59.0  (35.1) | n=8  202.7 (243.6) | n=0  0 | n=11  98.2 (131.3) | n=70  124.3 (150.8) |
| **Primary malignancy type, n (%)**  AML  NHLa  MM  CTCL  AML after MDS  MDS  Otherb | 43 (49)  18 (21)  10 (11)  6 (7)  4 (5)  –  6 (7) | –  –  –  –  –  16 (100)  – | –  –  –  7 (100)  –  –  – | –  –  –  1 (100)  –  –  – | –  –  –  8 (33)  –  16 (67)  – | 43 (39)  18 (16)  10 (9)  14 (13)  4 (4)  16 (14)  6 (5) |
| **Sites with extra-nodal involvement at diagnosis, n (%)c**  0  1  2  3 or more | n=24  6 (25)  9 (38)  3 (13)  6 (25) | –  –  –  – | –  –  –  – | –  –  –  – | –  –  –  – | n=24  6 (25)  9 (38)  3 (13)  6 (25) |
| **ISS stage at diagnosis, n (%)d**  1  2  3  Unknown | n=12  2 (17)  5 (42)  3 (25)  2 (17) | –  –  –  – | –  –  –  – | –  –  –  – | –  –  –  – | n=12  2 (17)  5 (42)  3 (25)  2 (17) |
| **Prior lines of chemotherapy, n (%)**  0  1  2  3  4  >4 | 5 (6)  20 (23)  19 (22)  21 (24)  12 (14)  10 (11) | 1 (6)  9 (56)  2 (13)  3 (19)  1 (6)  0 | 1 (14)  2 (29)  1 (14)  3 (43)  0  0 | 0  0  1 (100)  0  0  0 | 2 (8)  11 (46)  4 (17)  6 (25)  1 (4)  0 | 7 (6)  31 (28)  23 (21)  27 (24)  13 (12)  10 (9) |

All patients in each cohort had available data for each parameter, unless otherwise stated.

aIncluded patients with diffuse large B-cell lymphoma; bIncluded patients with the NHL-type malignancies Burkitt’s lymphoma, marginal zone B-cell lymphoma and metastatic acute T-cell leukemia/lymphoma; patients with the MM-type malignancies metastatic multiple myeloma and Bence Jones Kappa; and patients with de novo AML; cNHL cohort only; dMM cohort only.

AML, acute myeloid leukemia; BMI, body mass index; CTCL, cutaneous T-cell lymphoma; ISS, international staging system; MDS, myelodysplastic syndrome; MM, multiple myeloma; NHL, non-Hodgkin’s lymphoma; SD, standard deviation.

### Supplementary Table S2. Patient baseline demographics and clinical characteristics (Part 1 by dose tumor cohort; 60–120 mg QD doses).

|  | **Part 1** | | | | | | | | |
| --- | --- | --- | --- | --- | --- | --- | --- | --- | --- |
| **n, %** | **60 mg QD AML (n=8)** | **60 mg QD NHL (n=18)** | **60 mg QD MM  (n=3)** | **75 mg QD AML (n=8)** | **80 mg QDa (n=1)** | **80 mg QD AML (n=7)** | **80 mg QD NHL (n=7)** | **100 mg QD AML  (n=16)** | **120 mg QD AML  (n=6)** |
| **Age (years), mean (SD)** | 54.6 (20.5) | 59.6 (12.9) | 54.7 (11.0) | 66.9 (11.1) | 77.0 | 63.1 (13.9) | 50.0 (19.3) | 64.8 (12.7) | 61.8 (13.9) |
| **Female, n (%)** | 1 (13) | 5 (28) | 1 (33) | 7 (88) | 1 (100) | 4 (57) | 2 (29) | 6 (38) | 1 (17) |
| **BMI (kg/m2), mean (SD)** | n=8  28.4 (7.5) | n=17  26.4 (5.2) | n=3  26.2 (6.2) | n=8  27.5 (5.3) | n=1  20.3 | n=7  29.2 (5.8) | n=7  28.3 (6.5) | n=16  25.3 (5.5) | n=6  27.4 (6.4) |
| **Height (cm), mean (SD)** | n=8  174.4  (9.6) | n=17  168.0 (11.5) | n=3  157.0 (10.0) | n=8  164.1  (5.3) | n=1  157.0 | n=7  165.6 (7.5) | n=7  174.6 (15.2) | n=16  165.6 (11.0) | n=6  174.7 (8.9) |
| **Weight (kg), mean (SD)** | 87.2 (26.2) | 73.3 (12.9) | 63.5 (7.5) | 73.8 (13.1) | 50.1 | 80.5 (19.8) | 88.3 (32.0) | 69.1 (14.6) | 83.5 (21.8) |
| **Ethnicity, n (%)**  Hispanic or Latino  Not Hispanic or Latino | 2 (25)  6 (75) | 2 (11)  16 (89) | 1 (33)  2 (67) | 0  8 (100) | 0  1 (100) | 0  7 (100) | 0  7 (100) | 0  16 (100) | 0  6 (100) |
| **Race, n (%)**  African American / African  Asian  White (Caucasian)  Other | n=6  0  0  6 (100)  0 | n=18  1 (6)  5 (28)  12 (67)  0 | n=3  1 (33)  1 (33)  1 (33)  0 | n=8  0  0  8 (100)  0 | n=1  0  0  1 (100)  0 | n=7  2 (29)  0  5 (71)  0 | n=7  0  1 (14)  5 (71)  1 (14) | n=15  0  1 (7)  14 (93)  0 | n=6  0  0  6 (100)  0 |
| **ECOG performance status, n (%)**  0  1  2 | 2 (25)  5 (63)  1 (13) | 8 (44)  10 (56)  0 | 0  3 (100)  0 | 2 (25)  6 (75)  0 | 0  1 (100)  0 | 1 (14)  4 (57)  2 (29) | 1 (14)  6 (86)  0 | 2 (13)  11 (69)  3 (19) | 0  5 (83)  1 (17) |
| **Time since diagnosis (days), mean (SD)** | 321.8 (181.4) | 1352.3 (1637.8) | 2708.0 (1630.3) | 518.1 (730.8) | 869.0 | 604.7 (337.7) | 1447.4 (1531.1) | 441.4 (249.1) | 348.8 (250.2) |
| **Time since progression (days), mean (SD)** | n=6  53.8  (27.2) | n=12  124.4 (96.4) | n=1  10.0 | n=3  249.3 (255.8) | n=1  146.0 | n=7  133.6 (148.3) | n=4  174.0 (132.7) | n=13  110.9 (132.1) | n=2  32.0  (25.5) |
| **Primary malignancy, n (%)**  AML  NHL  MM  CTCL  AML after MDS  Other | 8 (100)  0  0  0  0  0 | 0  10 (56)  0  5 (28)  0  3 (17) | 0  0  2 (67)  0  0  1 (33) | 5 (63)  0  0  0  2 (25)  1 (13) | 1 (100)  0  0  0  0  0 | 6 (86)  0  0  0  1 (14)  0 | 0  6 (86)  0  1 (14)  0  0 | 16 (100)  0  0  0  0  0 | 6 (100)  0  0  0  0  0 |
| **Sites with extra-nodal involvement at diagnosis, n (%)b**  0  1  2  3 or more | n=0  0  0  0  0 | n=15  4 (27)  5 (33)  1 (7)  5 (33) | n=0  0  0  0  0 | n=0  0  0  0  0 | n=0  0  0  0  0 | n=0  0  0  0  0 | n=7  2 (29)  3 (43)  1 (14)  1 (14) | n=0  0  0  0  0 | n=0  0  0  0  0 |
| **ISS stage at diagnosis, n (%)c**  1  2  3  Unknown | n=0  0  0  0  0 | n=0  0  0  0  0 | n=3  0  1 (33)  2 (67)  0 | n=0  0  0  0  0 | n=0  0  0  0  0 | n=0  0  0  0  0 | n=0  0  0  0  0 | n=0  0  0  0  0 | n=0  0  0  0  0 |
| **Prior lines of chemotherapy, n (%)**  0  1  2  3  4  >4 | 0  2 (25)  2 (25)  3 (38)  1 (13)  0 | 1 (6)  3 (17)  4 (22)  1 (6)  6 (33)  3 (17) | 0  0  0  1 (33)  0  2 (67) | 1 (13)  2 (25)  3 (38)  1 (13)  0  1 (13) | 0  1 (100)  0  0  0  0 | 0  2 (29)  2 (29)  3 (43)  0  0 | 0  0  2 (29)  4 (57)  0  1 (14) | 2 (13)  6 (38)  2 (13)  3 (19)  3 (19)  0 | 0  2 (33)  0  2 (33)  1 (17)  1 (17) |

All patients in each cohort had available data for each parameter, unless otherwise stated.

aOne patient was listed in a separate 80 mg QD cohort due to a change in the electronic case report form data capture; bNHL cohort only; cMM cohort only.

AML, acute myeloid leukemia; BMI, body mass index; CTCL, cutaneous T-cell lymphoma; ISS, international staging system; MDS, myelodysplastic syndrome; MM, multiple myeloma; NHL, non-Hodgkin lymphoma; QD, once daily; SD, standard deviation.

### Supplementary Table S3. Summary of SAEs occurring in >1% of the total study population.

|  | **Part 1 population (n=87)** | **Part 2 MDS cohort  (n=16)** | **Part 2 CTCL cohort  (n=8)** | **Part 2 population (n=24)** | **Total study population (n=111)** |
| --- | --- | --- | --- | --- | --- |
| **Thrombocytopenia** | 19 (22) | 4 (25) | 0 | 4 (17) | 23 (21) |
| **Pneumonia** | 14 (16) | 0 | 0 | 0 | 14 (13) |
| **Febrile neutropenia** | 12 (14) | 0 | 0 | 0 | 12 (11) |
| **Sepsis** | 6 (7) | 1 (6) | 0 | 1 (4) | 7 (6) |
| **Pyrexia** | 5 (6) | 1 (6) | 0 | 1 (4) | 6 (5) |
| **Neutropenic sepsis** | 5 (6) | 1 (6) | 0 | 1 (4) | 6 (5) |
| **Respiratory failure** | 6 (7) | 0 | 0 | 0 | 6 (5) |
| **Acute kidney injury** | 4 (5) | 0 | 0 | 0 | 4 (4) |
| **Neutropenia** | 3 (3) | 1 (6) | 0 | 1 (4) | 4 (4) |
| **Diarrhea** | 3 (3) | 0 | 1 (13) | 1 (4) | 4 (4) |
| **Leukocytosis** | 3 (3) | 0 | 0 | 0 | 3 (3) |
| **Increased ALT** | 2 (2) | 0 | 1 (13) | 1 (4) | 3 (3) |
| **Decreased appetite** | 2 (2) | 1 (6) | 0 | 1 (4) | 3 (3) |
| **Hyperglycemia** | 1 (1) | 1 (6) | 1 (13) | 2 (8) | 3 (3) |
| **Hematuria** | 3 (3) | 0 | 0 | 0 | 3 (3) |
| **Hypotension** | 3 (3) | 0 | 0 | 0 | 3 (3) |
| **Increased blood bilirubin** | 2 (2) | 1 (6) | 0 | 1 (4) | 3 (3) |
| **Cardiac failure** | 2 (2) | 0 | 0 | 0 | 2 (2) |
| **Fatigue** | 2 (2) | 0 | 0 | 0 | 2 (2) |
| **Multiple organ dysfunction syndrome** | 1 (1) | 0 | 1 (6) | 1 (4) | 2 (2) |
| **Anaphylactic reaction** | 2 (2) | 0 | 0 | 0 | 2 (2) |
| **Bacterial sepsis** | 2 (2) | 0 | 0 | 0 | 2 (2) |
| **Cellulitis** | 0 | 1 (14) | 1 (6) | 2 (8) | 2 (2) |
| **Infection** | 2 (2) | 0 | 0 | 0 | 2 (2) |
| **Urinary tract infection** | 2 (2) | 0 | 0 | 0 | 2 (2) |
| **Rib fracture** | 2 (2) | 0 | 0 | 0 | 2 (2) |
| **Hypophosphatemia** | 1 (1) | 1 | 1 (6) | 1 (4) | 2 (2) |
| **Intracranial hemorrhage** | 2 (2) | 0 | 0 | 0 | 2 (2) |
| **Renal failure** | 1 (1) | 0 | 1 (6) | 1 (4) | 2 (2) |
| **Epistaxis** | 1 (1) | 0 | 1 (6) | 1 (4) | 2 (2) |
| **Pleural effusion** | 2 (2) | 0 | 0 | 0 | 2 (2) |

ALT, alanine aminotransferase; CTCL, cutaneous T-cell lymphoma; MDS, myelodysplastic syndrome; SAE, serious adverse event.

### Supplementary Table S4. Summary of AEs by grade in Part 1 (60–120 mg QD doses).

| **n, %** | **60 mg QD AML (n=8)** | | | | |
| --- | --- | --- | --- | --- | --- |
| **Grade 1** | **Grade 2** | **Grade 3** | **Grade 4** | **Grade 5** |
| **Any event** | 0 (0) | 3 (38) | 2 (25) | 1 (13) | 2 (25) |
| **Febrile neutropenia** | 0 (0) | 0 (0) | 4 (50) | 0 (0) | 0 (0) |
| **Blood bilirubin increased** | 1 (13) | 2 (25) | 0 (0) | 0 (0) | 0 (0) |
| **Diarrhea** | 3 (38) | 0 (0) | 0 (0) | 0 (0) | 0 (0) |
| **Dysgeusia** | 3 (38) | 0 (0) | 0 (0) | 0 (0) | 0 (0) |
| **Hypokalemia** | 2 (25) | 1 (13) | 0 (0) | 0 (0) | 0 (0) |
| **International normalized ratio increased** | 2 (25) | 1 (13) | 0 (0) | 0 (0) | 0 (0) |
| **Nausea** | 1 (13) | 2 (25) | 0 (0) | 0 (0) | 0 (0) |
| **Abdominal pain** | 2 (25) | 0 (0) | 0 (0) | 0 (0) | 0 (0) |
| **Blood creatinine increased** | 1 (13) | 1 (13) | 0 (0) | 0 (0) | 0 (0) |
| **Confusional state** | 1 (13) | 0 (0) | 1 (13) | 0 (0) | 0 (0) |
| **Constipation** | 1 (13) | 1 (13) | 0 (0) | 0 (0) | 0 (0) |
| **Cough** | 2 (25) | 0 (0) | 0 (0) | 0 (0) | 0 (0) |
| **Decreased appetite** | 0 (0) | 2 (25) | 0 (0) | 0 (0) | 0 (0) |
| **Dermatitis acneiform** | 2 (25) | 0 (0) | 0 (0) | 0 (0) | 0 (0) |
| **Dyspnea** | 1 (13) | 1 (13) | 0 (0) | 0 (0) | 0 (0) |
| **Hypotension** | 0 (0) | 1 (13) | 1 (13) | 0 (0) | 0 (0) |
| **Leukocytosis** | 0 (0) | 1 (13) | 0 (0) | 0 (0) | 1 (13) |
| **Muscle spasms** | 2 (25) | 0 (0) | 0 (0) | 0 (0) | 0 (0) |
| **Abdominal distension** | 0 (0) | 1 (13) | 0 (0) | 0 (0) | 0 (0) |
| **Acidosis** | 0 (0) | 1 (13) | 0 (0) | 0 (0) | 0 (0) |
| **Acute kidney injury** | 0 (0) | 0 (0) | 0 (0) | 0 (0) | 1 (13) |
| **Alanine aminotransferase increased** | 1 (13) | 0 (0) | 0 (0) | 0 (0) | 0 (0) |
| **Anal fistula** | 0 (0) | 1 (13) | 0 (0) | 0 (0) | 0 (0) |
| **Asthenia** | 0 (0) | 1 (13) | 0 (0) | 0 (0) | 0 (0) |
| **Back pain** | 0 (0) | 1 (13) | 0 (0) | 0 (0) | 0 (0) |
| **Bacterial sepsis** | 0 (0) | 0 (0) | 1 (13) | 0 (0) | 0 (0) |
| **Bradycardia** | 0 (0) | 1 (13) | 0 (0) | 0 (0) | 0 (0) |
| **Cholecystitis acute** | 0 (0) | 0 (0) | 0 (0) | 1 (13) | 0 (0) |
| **Clostridium difficile colitis** | 0 (0) | 1 (13) | 0 (0) | 0 (0) | 0 (0) |
| **Coagulopathy** | 0 (0) | 0 (0) | 1 (13) | 0 (0) | 0 (0) |
| **Delirium** | 1 (13) | 0 (0) | 0 (0) | 0 (0) | 0 (0) |
| **Depression** | 0 (0) | 1 (13) | 0 (0) | 0 (0) | 0 (0) |
| **Dry eye** | 1 (13) | 0 (0) | 0 (0) | 0 (0) | 0 (0) |
| **Dry mouth** | 1 (13) | 0 (0) | 0 (0) | 0 (0) | 0 (0) |
| **Dry skin** | 0 (0) | 1 (13) | 0 (0) | 0 (0) | 0 (0) |
| **Dysarthria** | 1 (13) | 0 (0) | 0 (0) | 0 (0) | 0 (0) |
| **Dysphagia** | 0 (0) | 1 (13) | 0 (0) | 0 (0) | 0 (0) |
| **Epistaxis** | 1 (13) | 0 (0) | 0 (0) | 0 (0) | 0 (0) |
| **Fatigue** | 1 (13) | 0 (0) | 0 (0) | 0 (0) | 0 (0) |
| **Fluid overload** | 0 (0) | 1 (13) | 0 (0) | 0 (0) | 0 (0) |
| **Hematuria** | 0 (0) | 0 (0) | 1 (13) | 0 (0) | 0 (0) |
| **Hyperbilirubinemia** | 0 (0) | 1 (13) | 0 (0) | 0 (0) | 0 (0) |
| **Hyperglycemia** | 0 (0) | 0 (0) | 1 (13) | 0 (0) | 0 (0) |
| **Hypoalbuminemia** | 0 (0) | 1 (13) | 0 (0) | 0 (0) | 0 (0) |
| **Hypomagnesemia** | 1 (13) | 0 (0) | 0 (0) | 0 (0) | 0 (0) |
| **Hyponatremia** | 0 (0) | 0 (0) | 1 (13) | 0 (0) | 0 (0) |
| **Lip exfoliation** | 0 (0) | 1 (13) | 0 (0) | 0 (0) | 0 (0) |
| **Lip infection** | 0 (0) | 1 (13) | 0 (0) | 0 (0) | 0 (0) |
| **Mouth ulceration** | 1 (13) | 0 (0) | 0 (0) | 0 (0) | 0 (0) |
| **Mucosal inflammation** | 0 (0) | 0 (0) | 1 (13) | 0 (0) | 0 (0) |
| **Multiple organ dysfunction syndrome** | 0 (0) | 0 (0) | 0 (0) | 1 (13) | 0 (0) |
| **Musculoskeletal pain** | 1 (13) | 0 (0) | 0 (0) | 0 (0) | 0 (0) |
| **Myalgia** | 1 (13) | 0 (0) | 0 (0) | 0 (0) | 0 (0) |
| **Neutropenic sepsis** | 0 (0) | 0 (0) | 0 (0) | 1 (13) | 0 (0) |
| **Non-cardiac chest pain** | 1 (13) | 0 (0) | 0 (0) | 0 (0) | 0 (0) |
| **Edema** | 1 (13) | 0 (0) | 0 (0) | 0 (0) | 0 (0) |
| **Edema peripheral** | 0 (0) | 1 (13) | 0 (0) | 0 (0) | 0 (0) |
| **Oropharyngeal pain** | 0 (0) | 1 (13) | 0 (0) | 0 (0) | 0 (0) |
| **Pain** | 0 (0) | 1 (13) | 0 (0) | 0 (0) | 0 (0) |
| **Palpitations** | 1 (13) | 0 (0) | 0 (0) | 0 (0) | 0 (0) |
| **Parosmia** | 1 (13) | 0 (0) | 0 (0) | 0 (0) | 0 (0) |
| **Petechiae** | 1 (13) | 0 (0) | 0 (0) | 0 (0) | 0 (0) |
| **Pleural effusion** | 0 (0) | 1 (13) | 0 (0) | 0 (0) | 0 (0) |
| **Pneumonia** | 0 (0) | 0 (0) | 1 (13) | 0 (0) | 0 (0) |
| **Pyrexia** | 0 (0) | 1 (13) | 0 (0) | 0 (0) | 0 (0) |
| **Rash** | 1 (13) | 0 (0) | 0 (0) | 0 (0) | 0 (0) |
| **Rash pustular** | 1 (13) | 0 (0) | 0 (0) | 0 (0) | 0 (0) |
| **Renal failure** | 0 (0) | 1 (13) | 0 (0) | 0 (0) | 0 (0) |
| **Respiratory failure** | 0 (0) | 0 (0) | 0 (0) | 0 (0) | 1 (13) |
| **Respiratory tract infection** | 0 (0) | 1 (13) | 0 (0) | 0 (0) | 0 (0) |
| **Septic shock** | 0 (0) | 0 (0) | 0 (0) | 1 (13) | 0 (0) |
| **Sinus tachycardia** | 1 (13) | 0 (0) | 0 (0) | 0 (0) | 0 (0) |
| **Supraventricular tachycardia** | 0 (0) | 0 (0) | 1 (13) | 0 (0) | 0 (0) |
| **Thrombophlebitis superficial** | 0 (0) | 1 (13) | 0 (0) | 0 (0) | 0 (0) |
| **Troponin I increased** | 1 (13) | 0 (0) | 0 (0) | 0 (0) | 0 (0) |
| **Tumor lysis syndrome** | 0 (0) | 0 (0) | 1 (13) | 0 (0) | 0 (0) |
| **Upper-airway cough syndrome** | 1 (13) | 0 (0) | 0 (0) | 0 (0) | 0 (0) |
| **Urinary incontinence** | 0 (0) | 1 (13) | 0 (0) | 0 (0) | 0 (0) |
| **Urinary tract infection** | 0 (0) | 1 (13) | 0 (0) | 0 (0) | 0 (0) |
| **Vaginal discharge** | 1 (13) | 0 (0) | 0 (0) | 0 (0) | 0 (0) |
| **Ventricular tachycardia** | 0 (0) | 1 (13) | 0 (0) | 0 (0) | 0 (0) |
| **Vitamin D deficiency** | 0 (0) | 1 (13) | 0 (0) | 0 (0) | 0 (0) |
| **Vomiting** | 1 (13) | 0 (0) | 0 (0) | 0 (0) | 0 (0) |
|  | **60 mg QD NHL (n=18)** | | | | |
| **n, %** | **Grade 1** | **Grade 2** | **Grade 3** | **Grade 4** | **Grade 5** |
| **Any event** | 0 (0) | 2 (11) | 8 (44) | 7 (39) | 1 (6) |
| **Thrombocytopenia** | 1 (6) | 1 (6) | 6 (33) | 8 (44) | 0 (0) |
| **Diarrhea** | 6 (33) | 1 (6) | 0 (0) | 0 (0) | 0 (0) |
| **Anemia** | 0 (0) | 2 (11) | 4 (22) | 0 (0) | 0 (0) |
| **Fatigue** | 3 (17) | 3 (17) | 0 (0) | 0 (0) | 0 (0) |
| **Nausea** | 4 (22) | 2 (11) | 0 (0) | 0 (0) | 0 (0) |
| **Activated partial thromboplastin time prolonged** | 3 (17) | 0 (0) | 2 (11) | 0 (0) | 0 (0) |
| **Pyrexia** | 4 (22) | 0 (0) | 1 (6) | 0 (0) | 0 (0) |
| **Blood bilirubin increased** | 1 (6) | 1 (6) | 2 (11) | 0 (0) | 0 (0) |
| **Abdominal pain** | 3 (17) | 0 (0) | 0 (0) | 0 (0) | 0 (0) |
| **Asthenia** | 0 (0) | 2 (11) | 1 (6) | 0 (0) | 0 (0) |
| **Decreased appetite** | 1 (6) | 1 (6) | 1 (6) | 0 (0) | 0 (0) |
| **Dry mouth** | 3 (17) | 0 (0) | 0 (0) | 0 (0) | 0 (0) |
| **Dysuria** | 2 (11) | 1 (6) | 0 (0) | 0 (0) | 0 (0) |
| **Neutropenia** | 1 (6) | 1 (6) | 1 (6) | 0 (0) | 0 (0) |
| **Rash** | 3 (17) | 0 (0) | 0 (0) | 0 (0) | 0 (0) |
| **Vomiting** | 3 (17) | 0 (0) | 0 (0) | 0 (0) | 0 (0) |
| **Constipation** | 2 (11) | 0 (0) | 0 (0) | 0 (0) | 0 (0) |
| **Contusion** | 2 (11) | 0 (0) | 0 (0) | 0 (0) | 0 (0) |
| **Dysgeusia** | 2 (11) | 0 (0) | 0 (0) | 0 (0) | 0 (0) |
| **Dyspnea** | 1 (6) | 1 (6) | 0 (0) | 0 (0) | 0 (0) |
| **Epistaxis** | 2 (11) | 0 (0) | 0 (0) | 0 (0) | 0 (0) |
| **Gastrointestinal motility disorder** | 2 (11) | 0 (0) | 0 (0) | 0 (0) | 0 (0) |
| **Hematuria** | 1 (6) | 1 (6) | 0 (0) | 0 (0) | 0 (0) |
| **International normalized ratio increased** | 2 (11) | 0 (0) | 0 (0) | 0 (0) | 0 (0) |
| **Leukopenia** | 1 (6) | 1 (6) | 0 (0) | 0 (0) | 0 (0) |
| **Lower respiratory tract infection** | 1 (6) | 0 (0) | 0 (0) | 0 (0) | 1 (6) |
| **Muscle spasms** | 2 (11) | 0 (0) | 0 (0) | 0 (0) | 0 (0) |
| **Edema peripheral** | 1 (6) | 1 (6) | 0 (0) | 0 (0) | 0 (0) |
| **Oropharyngeal pain** | 1 (6) | 0 (0) | 0 (0) | 0 (0) | 0 (0) |
| **Prothrombin time prolonged** | 2 (11) | 0 (0) | 0 (0) | 0 (0) | 0 (0) |
| **Stomatitis** | 1 (6) | 1 (6) | 0 (0) | 0 (0) | 0 (0) |
| **Troponin I increased** | 2 (11) | 0 (0) | 0 (0) | 0 (0) | 0 (0) |
| **Urinary tract infection** | 1 (6) | 0 (0) | 1 (6) | 0 (0) | 0 (0) |
| **Acute kidney injury** | 1 (6) | 0 (0) | 0 (0) | 0 (0) | 0 (0) |
| **Adult T-cell lymphoma/leukemia** | 0 (0) | 1 (6) | 0 (0) | 0 (0) | 0 (0) |
| **Alanine aminotransferase increased** | 0 (0) | 1 (6) | 0 (0) | 0 (0) | 0 (0) |
| **Amylase increased** | 1 (6) | 0 (0) | 0 (0) | 0 (0) | 0 (0) |
| **Anxiety** | 0 (0) | 1 (6) | 0 (0) | 0 (0) | 0 (0) |
| **Ascites** | 0 (0) | 0 (0) | 1 (6) | 0 (0) | 0 (0) |
| **Back pain** | 1 (6) | 0 (0) | 0 (0) | 0 (0) | 0 (0) |
| **Benign prostatic hyperplasia** | 0 (0) | 1 (6) | 0 (0) | 0 (0) | 0 (0) |
| **Blood alkaline phosphatase increased** | 0 (0) | 0 (0) | 1 (6) | 0 (0) | 0 (0) |
| **Blood chloride increased** | 1 (6) | 0 (0) | 0 (0) | 0 (0) | 0 (0) |
| **Blood fibrinogen decreased** | 1 (6) | 0 (0) | 0 (0) | 0 (0) | 0 (0) |
| **Blood insulin increased** | 1 (6) | 0 (0) | 0 (0) | 0 (0) | 0 (0) |
| **Candida infection** | 0 (0) | 0 (0) | 0 (0) | 0 (0) | 0 (0) |
| **Cough** | 0 (0) | 1 (6) | 0 (0) | 0 (0) | 0 (0) |
| **Decubitus ulcer** | 0 (0) | 1 (6) | 0 (0) | 0 (0) | 0 (0) |
| **Depression** | 0 (0) | 1 (6) | 0 (0) | 0 (0) | 0 (0) |
| **Dizziness** | 1 (6) | 0 (0) | 0 (0) | 0 (0) | 0 (0) |
| **Escherichia infection** | 1 (6) | 0 (0) | 0 (0) | 0 (0) | 0 (0) |
| **Fall** | 0 (0) | 1 (6) | 0 (0) | 0 (0) | 0 (0) |
| **Febrile neutropenia** | 0 (0) | 0 (0) | 1 (6) | 0 (0) | 0 (0) |
| **Flank pain** | 1 (6) | 0 (0) | 0 (0) | 0 (0) | 0 (0) |
| **Fluid overload** | 1 (6) | 0 (0) | 0 (0) | 0 (0) | 0 (0) |
| **Fungal test positive** | 1 (6) | 0 (0) | 0 (0) | 0 (0) | 0 (0) |
| **Gamma-glutamyl transferase increased** | 0 (0) | 1 (6) | 0 (0) | 0 (0) | 0 (0) |
| **General physical health deterioration** | 0 (0) | 0 (0) | 1 (6) | 0 (0) | 0 (0) |
| **Herpes ophthalmic** | 1 (6) | 0 (0) | 0 (0) | 0 (0) | 0 (0) |
| **Herpes zoster** | 0 (0) | 1 (6) | 0 (0) | 0 (0) | 0 (0) |
| **Hyperglycemia** | 0 (0) | 1 (6) | 0 (0) | 0 (0) | 0 (0) |
| **Hypoalbuminemia** | 1 (6) | 0 (0) | 0 (0) | 0 (0) | 0 (0) |
| **Hypokalemia** | 1 (6) | 0 (0) | 0 (0) | 0 (0) | 0 (0) |
| **Hypomagnesemia** | 1 (6) | 0 (0) | 0 (0) | 0 (0) | 0 (0) |
| **Hyponatremia** | 0 (0) | 0 (0) | 1 (6) | 0 (0) | 0 (0) |
| **Infection** | 0 (0) | 0 (0) | 1 (6) | 0 (0) | 0 (0) |
| **Insomnia** | 1 (6) | 0 (0) | 0 (0) | 0 (0) | 0 (0) |
| **Large intestine perforation** | 0 (0) | 0 (0) | 0 (0) | 1 (6) | 0 (0) |
| **Lymphopenia** | 1 (6) | 0 (0) | 0 (0) | 0 (0) | 0 (0) |
| **Muscular weakness** | 0 (0) | 1 (6) | 0 (0) | 0 (0) | 0 (0) |
| **Myalgia** | 1 (6) | 0 (0) | 0 (0) | 0 (0) | 0 (0) |
| **Oral herpes** | 0 (0) | 1 (6) | 0 (0) | 0 (0) | 0 (0) |
| **Pleuritic pain** | 1 (6) | 0 (0) | 0 (0) | 0 (0) | 0 (0) |
| **Pneumonia** | 0 (0) | 1 (6) | 0 (0) | 0 (0) | 0 (0) |
| **Presyncope** | 1 (6) | 0 (0) | 0 (0) | 0 (0) | 0 (0) |
| **Pulmonary edema** | 0 (0) | 0 (0) | 1 (6) | 0 (0) | 0 (0) |
| **Sinus tachycardia** | 1 (6) | 0 (0) | 0 (0) | 0 (0) | 0 (0) |
| **Skin ulcer** | 1 (6) | 0 (0) | 0 (0) | 0 (0) | 0 (0) |
| **Troponin increased** | 1 (6) | 0 (0) | 0 (0) | 0 (0) | 0 (0) |
| **Tumor pain** | 1 (6) | 0 (0) | 0 (0) | 0 (0) | 0 (0) |
| **Upper respiratory tract infection** | 1 (6) | 0 (0) | 0 (0) | 0 (0) | 0 (0) |
| **Vascular device infection** | 0 (0) | 0 (0) | 1 (6) | 0 (0) | 0 (0) |
| **White blood cell count decreased** | 1 (6) | 0 (0) | 0 (0) | 0 (0) | 0 (0) |
|  | **60 MG QD MM (n=3)** | | | | |
| **n, %** | **Grade 1** | **Grade 2** | **Grade 3** | **Grade 4** | **Grade 5** |
| **Any event** | 0 (0) | 0 (0) | 1 (33) | 1 (33) | 1 (33) |
| **Abdominal pain** | 1 (33) | 1 (33) | 0 (0) | 0 (0) | 0 (0) |
| **Decreased appetite** | 0 (0) | 1 (33) | 1 (33) | 0 (0) | 0 (0) |
| **Nausea** | 0 (0) | 2 (67) | 0 (0) | 0 (0) | 0 (0) |
| **Pyrexia** | 1 (33) | 1 (33) | 0 (0) | 0 (0) | 0 (0) |
| **Thrombocytopenia** | 0 (0) | 0 (0) | 1 (33) | 1 (33) | 0 (0) |
| **Vomiting** | 2 (67) | 0 (0) | 0 (0) | 0 (0) | 0 (0) |
| **Acute kidney injury** | 0 (0) | 0 (0) | 0 (0) | 1 (33) | 0 (0) |
| **Anemia** | 0 (0) | 0 (0) | 1 (33) | 0 (0) | 0 (0) |
| **Aspergillus infection** | 0 (0) | 0 (0) | 1 (33) | 0 (0) | 0 (0) |
| **Back pain** | 1 (33) | 0 (0) | 0 (0) | 0 (0) | 0 (0) |
| **Blood creatinine increased** | 0 (0) | 0 (0) | 1 (33) | 0 (0) | 0 (0) |
| **Bone pain** | 0 (0) | 0 (0) | 1 (33) | 0 (0) | 0 (0) |
| **Constipation** | 0 (0) | 0 (0) | 1 (33) | 0 (0) | 0 (0) |
| **Cough** | 1 (33) | 0 (0) | 0 (0) | 0 (0) | 0 (0) |
| **Depressed level of consciousness** | 0 (0) | 0 (0) | 1 (33) | 0 (0) | 0 (0) |
| **Dizziness** | 1 (33) | 0 (0) | 0 (0) | 0 (0) | 0 (0) |
| **Dry eye** | 1 (33) | 0 (0) | 0 (0) | 0 (0) | 0 (0) |
| **Dysarthria** | 1 (33) | 0 (0) | 0 (0) | 0 (0) | 0 (0) |
| **Dysphagia** | 0 (0) | 0 (0) | 1 (33) | 0 (0) | 0 (0) |
| **Dyspnea** | 0 (0) | 0 (0) | 0 (0) | 1 (33) | 0 (0) |
| **Ear discomfort** | 1 (33) | 0 (0) | 0 (0) | 0 (0) | 0 (0) |
| **Epistaxis** | 1 (33) | 0 (0) | 0 (0) | 0 (0) | 0 (0) |
| **Escherichia urinary tract infection** | 0 (0) | 1 (33) | 0 (0) | 0 (0) | 0 (0) |
| **Fatigue** | 0 (0) | 1 (33) | 0 (0) | 0 (0) | 0 (0) |
| **Headache** | 1 (33) | 0 (0) | 0 (0) | 0 (0) | 0 (0) |
| **Hypercalcemia** | 1 (33) | 0 (0) | 0 (0) | 0 (0) | 0 (0) |
| **Hypertension** | 0 (0) | 1 (33) | 0 (0) | 0 (0) | 0 (0) |
| **Hypoesthesia** | 1 (33) | 0 (0) | 0 (0) | 0 (0) | 0 (0) |
| **Hypokalemia** | 0 (0) | 0 (0) | 1 (33) | 0 (0) | 0 (0) |
| **Hypomagnesemia** | 1 (33) | 0 (0) | 0 (0) | 0 (0) | 0 (0) |
| **Influenza** | 0 (0) | 0 (0) | 1 (33) | 0 (0) | 0 (0) |
| **Multiple organ dysfunction syndrome** | 0 (0) | 0 (0) | 0 (0) | 0 (0) | 1 (33) |
| **Muscle spasms** | 1 (33) | 0 (0) | 0 (0) | 0 (0) | 0 (0) |
| **Musculoskeletal chest pain** | 1 (33) | 0 (0) | 0 (0) | 0 (0) | 0 (0) |
| **N-terminal prohormone brain natriuretic peptide increased** | 1 (33) | 0 (0) | 0 (0) | 0 (0) | 0 (0) |
| **Neuropathy peripheral** | 0 (0) | 1 (33) | 0 (0) | 0 (0) | 0 (0) |
| **Ocular discomfort** | 1 (33) | 0 (0) | 0 (0) | 0 (0) | 0 (0) |
| **Pain** | 1 (33) | 0 (0) | 0 (0) | 0 (0) | 0 (0) |
| **Pain in jaw** | 1 (33) | 0 (0) | 0 (0) | 0 (0) | 0 (0) |
| **Palpitations** | 1 (33) | 0 (0) | 0 (0) | 0 (0) | 0 (0) |
| **Penis injury** | 0 (0) | 1 (33) | 0 (0) | 0 (0) | 0 (0) |
| **Productive cough** | 1 (33) | 0 (0) | 0 (0) | 0 (0) | 0 (0) |
| **Respiratory failure** | 0 (0) | 0 (0) | 0 (0) | 0 (0) | 1 (33) |
| **Sepsis** | 0 (0) | 1 (33) | 0 (0) | 0 (0) | 0 (0) |
| **Staphylococcal infection** | 0 (0) | 1 (33) | 0 (0) | 0 (0) | 0 (0) |
| **Tumor lysis syndrome** | 0 (0) | 0 (0) | 0 (0) | 0 (0) | 1 (33) |
| **Urinary tract infection** | 0 (0) | 0 (0) | 1 (33) | 0 (0) | 0 (0) |
| **Ventricular extrasystoles** | 0 (0) | 1 (33) | 0 (0) | 0 (0) | 0 (0) |
| **Vision blurred** | 1 (33) | 0 (0) | 0 (0) | 0 (0) | 0 (0) |
| **Weight decreased** | 0 (0) | 1 (33) | 0 (0) | 0 (0) | 0 (0) |
|  | **75 mg QD AML (n=8)** | | | | |
| **n (%)** | **Grade 1** | **Grade 2** | **Grade 3** | **Grade 4** | **Grade 5** |
| **Any event** | 0 (0) | 0 (0) | 2 (25) | 3 (38) | 3 (38) |
| **Blood bilirubin increased** | 1 (13) | 2 (25) | 1 (13) | 0 (0) | 0 (0) |
| **Diarrhea** | 1 (13) | 3 (38) | 0 (0) | 0 (0) | 0 (0) |
| **Nausea** | 1 (13) | 3 (38) | 0 (0) | 0 (0) | 0 (0) |
| **Asthenia** | 0 (0) | 1 (13) | 2 (25) | 0 (0) | 0 (0) |
| **Decreased appetite** | 2 (25) | 1 (13) | 0 (0) | 0 (0) | 0 (0) |
| **Hyperbilirubinemia** | 0 (0) | 1 (13) | 2 (25) | 0 (0) | 0 (0) |
| **Hyperglycemia** | 1 (13) | 0 (0) | 1 (13) | 1 (13) | 0 (0) |
| **Thrombocytopenia** | 0 (0) | 0 (0) | 0 (0) | 3 (38) | 0 (0) |
| **Anemia** | 0 (0) | 0 (0) | 2 (25) | 0 (0) | 0 (0) |
| **Anxiety** | 1 (13) | 1 (13) | 0 (0) | 0 (0) | 0 (0) |
| **Cough** | 2 (25) | 0 (0) | 0 (0) | 0 (0) | 0 (0) |
| **Dehydration** | 1 (13) | 0 (0) | 1 (13) | 0 (0) | 0 (0) |
| **Dysgeusia** | 1 (13) | 1 (13) | 0 (0) | 0 (0) | 0 (0) |
| **Febrile neutropenia** | 0 (0) | 0 (0) | 2 (25) | 0 (0) | 0 (0) |
| **Hypoalbuminemia** | 0 (0) | 2 (25) | 0 (0) | 0 (0) | 0 (0) |
| **Hypokalemia** | 1 (13) | 0 (0) | 1 (13) | 0 (0) | 0 (0) |
| **Hypotension** | 0 (0) | 0 (0) | 2 (25) | 0 (0) | 0 (0) |
| **International normalized ratio increased** | 2 (25) | 0 (0) | 0 (0) | 0 (0) | 0 (0) |
| **Leukocytosis** | 0 (0) | 0 (0) | 1 (13) | 1 (13) | 0 (0) |
| **Neutropenia** | 0 (0) | 0 (0) | 0 (0) | 2 (25) | 0 (0) |
| **Abdominal discomfort** | 1 (13) | 0 (0) | 0 (0) | 0 (0) | 0 (0) |
| **Abdominal pain** | 0 (0) | 1 (13) | 0 (0) | 0 (0) | 0 (0) |
| **Activated partial thromboplastin time prolonged** | 1 (13) | 0 (0) | 0 (0) | 0 (0) | 0 (0) |
| **Acute graft versus disease oral host** | 0 (0) | 0 (0) | 1 (13) | 0 (0) | 0 (0) |
| **Arthralgia** | 0 (0) | 1 (13) | 0 (0) | 0 (0) | 0 (0) |
| **Back pain** | 0 (0) | 1 (13) | 0 (0) | 0 (0) | 0 (0) |
| **Bacteremia** | 0 (0) | 1 (13) | 0 (0) | 0 (0) | 0 (0) |
| **Blood bilirubin unconjugated increased** | 1 (13) | 0 (0) | 0 (0) | 0 (0) | 0 (0) |
| **Blood potassium decreased** | 1 (13) | 0 (0) | 0 (0) | 0 (0) | 0 (0) |
| **Clostridium difficile infection** | 1 (13) | 0 (0) | 0 (0) | 0 (0) | 0 (0) |
| **Conjunctival hemorrhage** | 1 (13) | 0 (0) | 0 (0) | 0 (0) | 0 (0) |
| **Constipation** | 0 (0) | 1 (13) | 0 (0) | 0 (0) | 0 (0) |
| **Dizziness** | 1 (13) | 0 (0) | 0 (0) | 0 (0) | 0 (0) |
| **Dizziness postural** | 1 (13) | 0 (0) | 0 (0) | 0 (0) | 0 (0) |
| **Dyspnea** | 0 (0) | 0 (0) | 1 (13) | 0 (0) | 0 (0) |
| **Dyspnea exertional** | 1 (13) | 0 (0) | 0 (0) | 0 (0) | 0 (0) |
| **Fatigue** | 0 (0) | 0 (0) | 1 (13) | 0 (0) | 0 (0) |
| **Gait disturbance** | 0 (0) | 1 (13) | 0 (0) | 0 (0) | 0 (0) |
| **Genital infection** | 0 (0) | 1 (13) | 0 (0) | 0 (0) | 0 (0) |
| **Gingival hypertrophy** | 0 (0) | 0 (0) | 1 (13) | 0 (0) | 0 (0) |
| **Hypermagnesemia** | 0 (0) | 0 (0) | 1 (13) | 0 (0) | 0 (0) |
| **Hypocalcemia** | 0 (0) | 1 (13) | 0 (0) | 0 (0) | 0 (0) |
| **Hypomagnesemia** | 1 (13) | 0 (0) | 0 (0) | 0 (0) | 0 (0) |
| **Hyponatremia** | 0 (0) | 0 (0) | 1 (13) | 0 (0) | 0 (0) |
| **Hypophagia** | 0 (0) | 1 (13) | 0 (0) | 0 (0) | 0 (0) |
| **Hypophosphatemia** | 0 (0) | 0 (0) | 1 (13) | 0 (0) | 0 (0) |
| **Large intestinal obstruction** | 0 (0) | 0 (0) | 1 (13) | 0 (0) | 0 (0) |
| **Lipase increased** | 0 (0) | 0 (0) | 1 (13) | 0 (0) | 0 (0) |
| **Malnutrition** | 0 (0) | 1 (13) | 0 (0) | 0 (0) | 0 (0) |
| **Mucosal inflammation** | 0 (0) | 0 (0) | 1 (13) | 0 (0) | 0 (0) |
| **Neck pain** | 1 (13) | 0 (0) | 0 (0) | 0 (0) | 0 (0) |
| **Neutropenic sepsis** | 0 (0) | 0 (0) | 0 (0) | 0 (0) | 1 (13) |
| **Ocular icterus** | 1 (13) | 0 (0) | 0 (0) | 0 (0) | 0 (0) |
| **Edema peripheral** | 1 (13) | 0 (0) | 0 (0) | 0 (0) | 0 (0) |
| **Oral disorder** | 1 (13) | 0 (0) | 0 (0) | 0 (0) | 0 (0) |
| **Oral herpes** | 0 (0) | 1 (13) | 0 (0) | 0 (0) | 0 (0) |
| **Oropharyngeal edema** | 0 (0) | 1 (13) | 0 (0) | 0 (0) | 0 (0) |
| **Pharyngeal erythema** | 1 (13) | 0 (0) | 0 (0) | 0 (0) | 0 (0) |
| **Pneumonia** | 0 (0) | 0 (0) | 1 (13) | 0 (0) | 0 (0) |
| **Pseudomonas infection** | 0 (0) | 0 (0) | 1 (13) | 0 (0) | 0 (0) |
| **Pyrexia** | 1 (13) | 0 (0) | 0 (0) | 0 (0) | 0 (0) |
| **Rash** | 1 (13) | 0 (0) | 0 (0) | 0 (0) | 0 (0) |
| **Respiratory failure** | 0 (0) | 0 (0) | 0 (0) | 0 (0) | 1 (13) |
| **Small intestinal obstruction** | 0 (0) | 0 (0) | 0 (0) | 0 (0) | 1 (13) |
| **Staphylococcal bacteremia** | 0 (0) | 0 (0) | 1 (13) | 0 (0) | 0 (0) |
| **Tachycardia** | 1 (13) | 0 (0) | 0 (0) | 0 (0) | 0 (0) |
| **Upper respiratory tract infection** | 1 (13) | 0 (0) | 0 (0) | 0 (0) | 0 (0) |
| **Vitamin B complex deficiency** | 0 (0) | 1 (13) | 0 (0) | 0 (0) | 0 (0) |
| **Vulva cyst** | 0 (0) | 1 (13) | 0 (0) | 0 (0) | 0 (0) |
|  | **80 mg QDa (n=1)** | | | | |
| **n (%)** | **Grade 1** | **Grade 2** | **Grade 3** | **Grade 4** | **Grade 5** |
| **Any event** | 0 (0) | 0 (0) | 1 (100) | 0 (0) | 0 (0) |
| **Activated partial thromboplastin time prolonged** | 1 (100) | 0 (0) | 0 (0) | 0 (0) | 0 (0) |
| **Alanine aminotransferase increased** | 0 (0) | 1 (100) | 0 (0) | 0 (0) | 0 (0) |
| **Anemia** | 0 (0) | 0 (0) | 1 (100) | 0 (0) | 0 (0) |
| **Anxiety** | 0 (0) | 1 (100) | 0 (0) | 0 (0) | 0 (0) |
| **Aspartate aminotransferase increased** | 0 (0) | 1 (100) | 0 (0) | 0 (0) | 0 (0) |
| **Blood bilirubin increased** | 0 (0) | 1 (100) | 0 (0) | 0 (0) | 0 (0) |
| **Blood fibrinogen decreased** | 0 (0) | 1 (100) | 0 (0) | 0 (0) | 0 (0) |
| **Clostridium difficile colitis** | 0 (0) | 1 (100) | 0 (0) | 0 (0) | 0 (0) |
| **Constipation** | 0 (0) | 1 (100) | 0 (0) | 0 (0) | 0 (0) |
| **Deep vein thrombosis** | 0 (0) | 1 (100) | 0 (0) | 0 (0) | 0 (0) |
| **Depression** | 0 (0) | 1 (100) | 0 (0) | 0 (0) | 0 (0) |
| **Diarrhea** | 1 (100) | 0 (0) | 0 (0) | 0 (0) | 0 (0) |
| **Dyspepsia** | 1 (100) | 0 (0) | 0 (0) | 0 (0) | 0 (0) |
| **Enterococcal sepsis** | 0 (0) | 1 (100) | 0 (0) | 0 (0) | 0 (0) |
| **Flatulence** | 0 (0) | 1 (100) | 0 (0) | 0 (0) | 0 (0) |
| **Hemorrhage intracranial** | 0 (0) | 0 (0) | 1 (100) | 0 (0) | 0 (0) |
| **Hypertension** | 0 (0) | 0 (0) | 1 (100) | 0 (0) | 0 (0) |
| **Hypoalbuminemia** | 0 (0) | 1 (100) | 0 (0) | 0 (0) | 0 (0) |
| **Hypokalemia** | 0 (0) | 0 (0) | 1 (100) | 0 (0) | 0 (0) |
| **Hypomagnesemia** | 0 (0) | 1 (100) | 0 (0) | 0 (0) | 0 (0) |
| **Hyponatremia** | 1 (100) | 0 (0) | 0 (0) | 0 (0) | 0 (0) |
| **Hypophosphatemia** | 1 (100) | 0 (0) | 0 (0) | 0 (0) | 0 (0) |
| **Hypotension** | 0 (0) | 1 (100) | 0 (0) | 0 (0) | 0 (0) |
| **Hypothrombinemia** | 1 (100) | 0 (0) | 0 (0) | 0 (0) | 0 (0) |
| **Leukocytosis** | 0 (0) | 0 (0) | 1 (100) | 0 (0) | 0 (0) |
| **Mental status changes** | 0 (0) | 1 (100) | 0 (0) | 0 (0) | 0 (0) |
| **Muscular weakness** | 1 (100) | 0 (0) | 0 (0) | 0 (0) | 0 (0) |
| **Musculoskeletal pain** | 0 (0) | 1 (100) | 0 (0) | 0 (0) | 0 (0) |
| **Nasal congestion** | 0 (0) | 1 (100) | 0 (0) | 0 (0) | 0 (0) |
| **Non-cardiac chest pain** | 0 (0) | 1 (100) | 0 (0) | 0 (0) | 0 (0) |
| **Oral pain** | 1 (100) | 0 (0) | 0 (0) | 0 (0) | 0 (0) |
| **Pneumonia** | 0 (0) | 0 (0) | 1 (100) | 0 (0) | 0 (0) |
| **Road traffic accident** | 0 (0) | 0 (0) | 1 (100) | 0 (0) | 0 (0) |
| **Sepsis** | 0 (0) | 1 (100) | 0 (0) | 0 (0) | 0 (0) |
| **Sinus tachycardia** | 0 (0) | 1 (100) | 0 (0) | 0 (0) | 0 (0) |
| **Syncope** | 0 (0) | 0 (0) | 1 (100) | 0 (0) | 0 (0) |
| **Vomiting** | 0 (0) | 1 (100) | 0 (0) | 0 (0) | 0 (0) |
| **White blood cell count decreased** | 0 (0) | 0 (0) | 1 (100) | 0 (0) | 0 (0) |
|  | **80 mg QD AML (n=7)** | | | | |
| **n (%)** | **Grade 1** | **Grade 2** | **Grade 3** | **Grade 4** | **Grade 5** |
| **Any event** | 0 (0) | 0 (0) | 4 (57) | 1 (14) | 2 (29) |
| **Nausea** | 3 (43) | 3 (43) | 0 (0) | 0 (0) | 0 (0) |
| **Diarrhea** | 1 (14) | 2 (29) | 1 (14) | 0 (0) | 0 (0) |
| **Fatigue** | 0 (0) | 3 (43) | 0 (0) | 1 (14) | 0 (0) |
| **Blood bilirubin increased** | 0 (0) | 3 (43) | 0 (0) | 0 (0) | 0 (0) |
| **Dysgeusia** | 3 (43) | 0 (0) | 0 (0) | 0 (0) | 0 (0) |
| **Epistaxis** | 3 (43) | 0 (0) | 0 (0) | 0 (0) | 0 (0) |
| **Febrile neutropenia** | 0 (0) | 0 (0) | 2 (29) | 0 (0) | 1 (14) |
| **Hypertension** | 0 (0) | 2 (29) | 1 (14) | 0 (0) | 0 (0) |
| **Pneumonia** | 0 (0) | 0 (0) | 2 (29) | 1 (14) | 0 (0) |
| **Back pain** | 1 (14) | 0 (0) | 1 (14) | 0 (0) | 0 (0) |
| **Cough** | 1 (14) | 1 (14) | 0 (0) | 0 (0) | 0 (0) |
| **Decreased appetite** | 1 (14) | 1 (14) | 0 (0) | 0 (0) | 0 (0) |
| **Dyspepsia** | 1 (14) | 1 (14) | 0 (0) | 0 (0) | 0 (0) |
| **Headache** | 2 (29) | 0 (0) | 0 (0) | 0 (0) | 0 (0) |
| **Malaise** | 1 (14) | 1 (14) | 0 (0) | 0 (0) | 0 (0) |
| **Mucosal inflammation** | 0 (0) | 2 (29) | 0 (0) | 0 (0) | 0 (0) |
| **Musculoskeletal pain** | 0 (0) | 2 (29) | 0 (0) | 0 (0) | 0 (0) |
| **Pyrexia** | 2 (29) | 0 (0) | 0 (0) | 0 (0) | 0 (0) |
| **Vomiting** | 1 (14) | 1 (14) | 0 (0) | 0 (0) | 0 (0) |
| **Abdominal pain** | 0 (0) | 1 (14) | 0 (0) | 0 (0) | 0 (0) |
| **Activated partial thromboplastin time prolonged** | 1 (14) | 0 (0) | 0 (0) | 0 (0) | 0 (0) |
| **Amylase increased** | 0 (0) | 0 (0) | 1 (14) | 0 (0) | 0 (0) |
| **Anemia** | 0 (0) | 0 (0) | 1 (14) | 0 (0) | 0 (0) |
| **Anal fistula** | 1 (14) | 0 (0) | 0 (0) | 0 (0) | 0 (0) |
| **Anaphylactic reaction** | 0 (0) | 0 (0) | 1 (14) | 0 (0) | 0 (0) |
| **Aphasia** | 1 (14) | 0 (0) | 0 (0) | 0 (0) | 0 (0) |
| **Bacterial sepsis** | 0 (0) | 0 (0) | 1 (14) | 0 (0) | 0 (0) |
| **Blood creatinine increased** | 1 (14) | 0 (0) | 0 (0) | 0 (0) | 0 (0) |
| **Brain natriuretic peptide increased** | 0 (0) | 1 (14) | 0 (0) | 0 (0) | 0 (0) |
| **Coagulopathy** | 1 (14) | 0 (0) | 0 (0) | 0 (0) | 0 (0) |
| **Confusional state** | 0 (0) | 1 (14) | 0 (0) | 0 (0) | 0 (0) |
| **Dysphonia** | 0 (0) | 0 (0) | 1 (14) | 0 (0) | 0 (0) |
| **Dyspnea** | 0 (0) | 1 (14) | 0 (0) | 0 (0) | 0 (0) |
| **Ear pain** | 0 (0) | 1 (14) | 0 (0) | 0 (0) | 0 (0) |
| **Electrocardiogram QT prolonged** | 1 (14) | 0 (0) | 0 (0) | 0 (0) | 0 (0) |
| **Eye pain** | 1 (14) | 0 (0) | 0 (0) | 0 (0) | 0 (0) |
| **Fall** | 1 (14) | 0 (0) | 0 (0) | 0 (0) | 0 (0) |
| **Fluid overload** | 1 (14) | 0 (0) | 0 (0) | 0 (0) | 0 (0) |
| **Gastrointestinal hemorrhage** | 1 (14) | 0 (0) | 0 (0) | 0 (0) | 0 (0) |
| **Hemorrhoids** | 0 (0) | 1 (14) | 0 (0) | 0 (0) | 0 (0) |
| **Hyperglycemia** | 0 (0) | 0 (0) | 1 (14) | 0 (0) | 0 (0) |
| **Hypernatremia** | 0 (0) | 1 (14) | 0 (0) | 0 (0) | 0 (0) |
| **Hypertriglyceridemia** | 0 (0) | 0 (0) | 0 (0) | 1 (14) | 0 (0) |
| **Hyperuricemia** | 1 (14) | 0 (0) | 0 (0) | 0 (0) | 0 (0) |
| **Hypoesthesia** | 1 (14) | 0 (0) | 0 (0) | 0 (0) | 0 (0) |
| **Hypokalemia** | 1 (14) | 0 (0) | 0 (0) | 0 (0) | 0 (0) |
| **Hypomagnesemia** | 0 (0) | 1 (14) | 0 (0) | 0 (0) | 0 (0) |
| **International normalized ratio increased** | 1 (14) | 0 (0) | 0 (0) | 0 (0) | 0 (0) |
| **Mucormycosis** | 0 (0) | 0 (0) | 1 (14) | 0 (0) | 0 (0) |
| **Musculoskeletal chest pain** | 0 (0) | 1 (14) | 0 (0) | 0 (0) | 0 (0) |
| **Myalgia** | 1 (14) | 0 (0) | 0 (0) | 0 (0) | 0 (0) |
| **N-terminal prohormone brain natriuretic peptide increased** | 0 (0) | 1 (14) | 0 (0) | 0 (0) | 0 (0) |
| **Neutropenic sepsis** | 0 (0) | 0 (0) | 1 (14) | 0 (0) | 0 (0) |
| **Pain in extremity** | 0 (0) | 1 (14) | 0 (0) | 0 (0) | 0 (0) |
| **Photophobia** | 1 (14) | 0 (0) | 0 (0) | 0 (0) | 0 (0) |
| **Pleural effusion** | 1 (14) | 0 (0) | 0 (0) | 0 (0) | 0 (0) |
| **Pruritus** | 1 (14) | 0 (0) | 0 (0) | 0 (0) | 0 (0) |
| **Rash** | 0 (0) | 1 (14) | 0 (0) | 0 (0) | 0 (0) |
| **Rash maculo-papular** | 1 (14) | 0 (0) | 0 (0) | 0 (0) | 0 (0) |
| **Rectal hemorrhage** | 1 (14) | 0 (0) | 0 (0) | 0 (0) | 0 (0) |
| **Respiratory failure** | 0 (0) | 0 (0) | 0 (0) | 0 (0) | 1 (14) |
| **Rhinitis** | 0 (0) | 1 (14) | 0 (0) | 0 (0) | 0 (0) |
| **Rhinovirus infection** | 0 (0) | 1 (14) | 0 (0) | 0 (0) | 0 (0) |
| **Swelling** | 1 (14) | 0 (0) | 0 (0) | 0 (0) | 0 (0) |
| **Taste disorder** | 1 (14) | 0 (0) | 0 (0) | 0 (0) | 0 (0) |
| **Troponin increased** | 1 (14) | 0 (0) | 0 (0) | 0 (0) | 0 (0) |
| **Urinary tract infection** | 0 (0) | 1 (14) | 0 (0) | 0 (0) | 0 (0) |
| **Vaginal hemorrhage** | 1 (14) | 0 (0) | 0 (0) | 0 (0) | 0 (0) |
| **Vision blurred** | 1 (14) | 0 (0) | 0 (0) | 0 (0) | 0 (0) |
| **Weight decreased** | 0 (0) | 1 (14) | 0 (0) | 0 (0) | 0 (0) |
|  | **80 mg QD NHL (n=7)** | | | | |
| **n (%)** | **Grade 1** | **Grade 2** | **Grade 3** | **Grade 4** | **Grade 5** |
| **Any event** | 0 (0) | 0 (0) | 1 (14) | 6 (86) | 0 (0) |
| **Thrombocytopenia** | 0 (0) | 0 (0) | 2 (29) | 5 (71) | 0 (0) |
| **Hyperglycemia** | 1 (14) | 1 (14) | 2 (29) | 0 (0) | 0 (0) |
| **Anemia** | 0 (0) | 1 (14) | 2 (29) | 0 (0) | 0 (0) |
| **Diarrhea** | 3 (43) | 0 (0) | 0 (0) | 0 (0) | 0 (0) |
| **Fatigue** | 1 (14) | 1 (14) | 1 (14) | 0 (0) | 0 (0) |
| **Asthenia** | 1 (14) | 0 (0) | 1 (14) | 0 (0) | 0 (0) |
| **Nausea** | 2 (29) | 0 (0) | 0 (0) | 0 (0) | 0 (0) |
| **Pneumonia** | 0 (0) | 1 (14) | 1 (14) | 0 (0) | 0 (0) |
| **Rash** | 1 (14) | 1 (14) | 0 (0) | 0 (0) | 0 (0) |
| **Alanine aminotransferase increased** | 0 (0) | 0 (0) | 1 (14) | 0 (0) | 0 (0) |
| **Anorectal disorder** | 0 (0) | 1 (14) | 0 (0) | 0 (0) | 0 (0) |
| **Anxiety** | 1 (14) | 0 (0) | 0 (0) | 0 (0) | 0 (0) |
| **Aspartate aminotransferase increased** | 0 (0) | 1 (14) | 0 (0) | 0 (0) | 0 (0) |
| **Bleeding varicose vein** | 1 (14) | 0 (0) | 0 (0) | 0 (0) | 0 (0) |
| **Blood bilirubin increased** | 0 (0) | 1 (14) | 0 (0) | 0 (0) | 0 (0) |
| **Blood creatine phosphokinase increased** | 0 (0) | 0 (0) | 0 (0) | 1 (14) | 0 (0) |
| **Blood magnesium decreased** | 1 (14) | 0 (0) | 0 (0) | 0 (0) | 0 (0) |
| **Cancer pain** | 0 (0) | 0 (0) | 1 (14) | 0 (0) | 0 (0) |
| **Chest pain** | 0 (0) | 1 (14) | 0 (0) | 0 (0) | 0 (0) |
| **Chills** | 1 (14) | 0 (0) | 0 (0) | 0 (0) | 0 (0) |
| **Compression fracture** | 0 (0) | 1 (14) | 0 (0) | 0 (0) | 0 (0) |
| **Constipation** | 0 (0) | 0 (0) | 1 (14) | 0 (0) | 0 (0) |
| **Cough** | 0 (0) | 0 (0) | 0 (0) | 0 (0) | 0 (0) |
| **Decreased appetite** | 1 (14) | 0 (0) | 0 (0) | 0 (0) | 0 (0) |
| **Dizziness** | 1 (14) | 0 (0) | 0 (0) | 0 (0) | 0 (0) |
| **Dry eye** | 1 (14) | 0 (0) | 0 (0) | 0 (0) | 0 (0) |
| **Dysgeusia** | 1 (14) | 0 (0) | 0 (0) | 0 (0) | 0 (0) |
| **Dyspnea** | 1 (14) | 0 (0) | 0 (0) | 0 (0) | 0 (0) |
| **Ear infection** | 0 (0) | 1 (14) | 0 (0) | 0 (0) | 0 (0) |
| **Epistaxis** | 1 (14) | 0 (0) | 0 (0) | 0 (0) | 0 (0) |
| **Folate deficiency** | 0 (0) | 1 (14) | 0 (0) | 0 (0) | 0 (0) |
| **Hyperbilirubinemia** | 1 (14) | 0 (0) | 0 (0) | 0 (0) | 0 (0) |
| **Hypoesthesia** | 1 (14) | 0 (0) | 0 (0) | 0 (0) | 0 (0) |
| **Infection** | 0 (0) | 0 (0) | 1 (14) | 0 (0) | 0 (0) |
| **Insomnia** | 1 (14) | 0 (0) | 0 (0) | 0 (0) | 0 (0) |
| **Lower respiratory tract infection** | 1 (14) | 0 (0) | 0 (0) | 0 (0) | 0 (0) |
| **Mucosal inflammation** | 1 (14) | 0 (0) | 0 (0) | 0 (0) | 0 (0) |
| **Muscular weakness** | 0 (0) | 0 (0) | 1 (14) | 0 (0) | 0 (0) |
| **Nail infection** | 1 (14) | 0 (0) | 0 (0) | 0 (0) | 0 (0) |
| **Oral herpes** | 0 (0) | 1 (14) | 0 (0) | 0 (0) | 0 (0) |
| **Osteomyelitis** | 0 (0) | 0 (0) | 1 (14) | 0 (0) | 0 (0) |
| **Pain in extremity** | 1 (14) | 0 (0) | 0 (0) | 0 (0) | 0 (0) |
| **Pain of skin** | 1 (14) | 0 (0) | 0 (0) | 0 (0) | 0 (0) |
| **Pelvic pain** | 1 (14) | 0 (0) | 0 (0) | 0 (0) | 0 (0) |
| **Performance status decreased** | 0 (0) | 0 (0) | 1 (14) | 0 (0) | 0 (0) |
| **Pruritus** | 1 (14) | 0 (0) | 0 (0) | 0 (0) | 0 (0) |
| **Pyrexia** | 1 (14) | 0 (0) | 0 (0) | 0 (0) | 0 (0) |
| **Renal failure** | 0 (0) | 0 (0) | 1 (14) | 0 (0) | 0 (0) |
| **Retinal vein occlusion** | 1 (14) | 0 (0) | 0 (0) | 0 (0) | 0 (0) |
| **Skin hyperpigmentation** | 1 (14) | 0 (0) | 0 (0) | 0 (0) | 0 (0) |
| **Skin infection** | 1 (14) | 0 (0) | 0 (0) | 0 (0) | 0 (0) |
| **Tinea versicolor** | 1 (14) | 0 (0) | 0 (0) | 0 (0) | 0 (0) |
| **Troponin I increased** | 0 (0) | 0 (0) | 1 (14) | 0 (0) | 0 (0) |
| **Upper respiratory tract infection** | 0 (0) | 1 (14) | 0 (0) | 0 (0) | 0 (0) |
| **Upper-airway cough syndrome** | 1 (14) | 0 (0) | 0 (0) | 0 (0) | 0 (0) |
| **Varicose vein ruptured** | 0 (0) | 1 (14) | 0 (0) | 0 (0) | 0 (0) |
| **Vomiting** | 1 (14) | 0 (0) | 0 (0) | 0 (0) | 0 (0) |
|  | **100 mg QD AML (n=16)** | | | | |
| **n (%)** | **Grade 1** | **Grade 2** | **Grade 3** | **Grade 4** | **Grade 5** |
| **Any event** | 0 (0) | 1 (6) | 6 (38) | 1 (6) | 8 (50) |
| **Blood bilirubin increased** | 0 (0) | 4 (25) | 6 (38) | 1 (6) | 0 (0) |
| **Diarrhea** | 5 (31) | 3 (19) | 3 (19) | 0 (0) | 0 (0) |
| **International normalized ratio increased** | 4 (25) | 1 (6) | 2 (13) | 1 (6) | 0 (0) |
| **Nausea** | 2 (13) | 6 (38) | 0 (0) | 0 (0) | 0 (0) |
| **Hyperglycemia** | 0 (0) | 3 (19) | 4 (25) | 0 (0) | 0 (0) |
| **Dysgeusia** | 4 (25) | 2 (13) | 0 (0) | 0 (0) | 0 (0) |
| **Acute kidney injury** | 0 (0) | 2 (13) | 2 (13) | 0 (0) | 1 (6) |
| **Decreased appetite** | 2 (13) | 3 (19) | 0 (0) | 0 (0) | 0 (0) |
| **Fatigue** | 2 (13) | 1 (6) | 2 (13) | 0 (0) | 0 (0) |
| **Pneumonia** | 0 (0) | 0 (0) | 3 (19) | 0 (0) | 2 (13) |
| **Activated partial thromboplastin time prolonged** | 3 (19) | 0 (0) | 0 (0) | 1 (6) | 0 (0) |
| **Febrile neutropenia** | 0 (0) | 0 (0) | 3 (19) | 1 (6) | 0 (0) |
| **Hypokalemia** | 2 (13) | 1 (6) | 1 (6) | 0 (0) | 0 (0) |
| **Pyrexia** | 3 (19) | 1 (6) | 0 (0) | 0 (0) | 0 (0) |
| **Sepsis** | 0 (0) | 0 (0) | 0 (0) | 0 (0) | 4 (25) |
| **Vomiting** | 3 (19) | 1 (6) | 0 (0) | 0 (0) | 0 (0) |
| **Abdominal pain** | 1 (6) | 2 (13) | 0 (0) | 0 (0) | 0 (0) |
| **Anemia** | 0 (0) | 1 (6) | 2 (13) | 0 (0) | 0 (0) |
| **Constipation** | 2 (13) | 1 (6) | 0 (0) | 0 (0) | 0 (0) |
| **Cough** | 2 (13) | 1 (6) | 0 (0) | 0 (0) | 0 (0) |
| **Dizziness** | 3 (19) | 0 (0) | 0 (0) | 0 (0) | 0 (0) |
| **Neutropenic sepsis** | 0 (0) | 1 (6) | 1 (6) | 0 (0) | 1 (6) |
| **Edema peripheral** | 3 (19) | 0 (0) | 0 (0) | 0 (0) | 0 (0) |
| **Respiratory failure** | 0 (0) | 1 (6) | 0 (0) | 0 (0) | 2 (13) |
| **Blood creatinine increased** | 2 (13) | 0 (0) | 0 (0) | 0 (0) | 0 (0) |
| **Coagulopathy** | 2 (13) | 0 (0) | 0 (0) | 0 (0) | 0 (0) |
| **Dyspnea** | 1 (6) | 0 (0) | 1 (6) | 0 (0) | 0 (0) |
| **Epistaxis** | 2 (13) | 0 (0) | 0 (0) | 0 (0) | 0 (0) |
| **Hematuria** | 1 (6) | 0 (0) | 1 (6) | 0 (0) | 0 (0) |
| **Hypocalcemia** | 0 (0) | 1 (6) | 1 (6) | 0 (0) | 0 (0) |
| **Hypomagnesemia** | 2 (13) | 0 (0) | 0 (0) | 0 (0) | 0 (0) |
| **Hyponatremia** | 0 (0) | 0 (0) | 2 (13) | 0 (0) | 0 (0) |
| **Hypophosphatemia** | 0 (0) | 1 (6) | 1 (6) | 0 (0) | 0 (0) |
| **Mucosal inflammation** | 1 (6) | 0 (0) | 1 (6) | 0 (0) | 0 (0) |
| **Myalgia** | 2 (13) | 0 (0) | 0 (0) | 0 (0) | 0 (0) |
| **Pain** | 1 (6) | 0 (0) | 1 (6) | 0 (0) | 0 (0) |
| **Rash** | 1 (6) | 1 (6) | 0 (0) | 0 (0) | 0 (0) |
| **Skin lesion** | 2 (13) | 0 (0) | 0 (0) | 0 (0) | 0 (0) |
| **Tachycardia** | 2 (13) | 0 (0) | 0 (0) | 0 (0) | 0 (0) |
| **Taste disorder** | 2 (13) | 0 (0) | 0 (0) | 0 (0) | 0 (0) |
| **Troponin increased** | 1 (6) | 0 (0) | 1 (6) | 0 (0) | 0 (0) |
| **Alanine aminotransferase increased** | 0 (0) | 0 (0) | 1 (6) | 0 (0) | 0 (0) |
| **Amylase increased** | 0 (0) | 0 (0) | 0 (0) | 1 (6) | 0 (0) |
| **Appetite disorder** | 0 (0) | 1 (6) | 0 (0) | 0 (0) | 0 (0) |
| **Arthropathy** | 1 (6) | 0 (0) | 0 (0) | 0 (0) | 0 (0) |
| **Ascites** | 0 (0) | 1 (6) | 0 (0) | 0 (0) | 0 (0) |
| **Aspartate aminotransferase increased** | 0 (0) | 1 (6) | 0 (0) | 0 (0) | 0 (0) |
| **Atrial fibrillation** | 0 (0) | 1 (6) | 0 (0) | 0 (0) | 0 (0) |
| **Back pain** | 1 (6) | 0 (0) | 0 (0) | 0 (0) | 0 (0) |
| **Bacteremia** | 0 (0) | 0 (0) | 1 (6) | 0 (0) | 0 (0) |
| **Blood calcium decreased** | 1 (6) | 0 (0) | 0 (0) | 0 (0) | 0 (0) |
| **Blood magnesium decreased** | 1 (6) | 0 (0) | 0 (0) | 0 (0) | 0 (0) |
| **Blood potassium decreased** | 1 (6) | 0 (0) | 0 (0) | 0 (0) | 0 (0) |
| **Blood pressure increased** | 0 (0) | 1 (6) | 0 (0) | 0 (0) | 0 (0) |
| **Bone pain** | 0 (0) | 1 (6) | 0 (0) | 0 (0) | 0 (0) |
| **Cardiac failure** | 1 (6) | 0 (0) | 0 (0) | 0 (0) | 0 (0) |
| **Cellulitis** | 0 (0) | 1 (6) | 0 (0) | 0 (0) | 0 (0) |
| **Cerebrovascular accident** | 1 (6) | 0 (0) | 0 (0) | 0 (0) | 0 (0) |
| **Chest pain** | 0 (0) | 1 (6) | 0 (0) | 0 (0) | 0 (0) |
| **Chills** | 1 (6) | 0 (0) | 0 (0) | 0 (0) | 0 (0) |
| **Chloroma** | 0 (0) | 0 (0) | 1 (6) | 0 (0) | 0 (0) |
| **Clostridium difficile** | 0 (0) | 0 (0) | 1 (6) | 0 (0) | 0 (0) |
| **Clostridium difficile** | 0 (0) | 0 (0) | 1 (6) | 0 (0) | 0 (0) |
| **Colitis** | 1 (6) | 0 (0) | 0 (0) | 0 (0) | 0 (0) |
| **Confusional state** | 1 (6) | 0 (0) | 0 (0) | 0 (0) | 0 (0) |
| **Dehydration** | 0 (0) | 0 (0) | 1 (6) | 0 (0) | 0 (0) |
| **Dermatitis acneiform** | 1 (6) | 0 (0) | 0 (0) | 0 (0) | 0 (0) |
| **Diastolic dysfunction** | 0 (0) | 1 (6) | 0 (0) | 0 (0) | 0 (0) |
| **Disseminated intravascular coagulation** | 0 (0) | 0 (0) | 1 (6) | 0 (0) | 0 (0) |
| **Dyspepsia** | 1 (6) | 0 (0) | 0 (0) | 0 (0) | 0 (0) |
| **Dysphagia** | 0 (0) | 1 (6) | 0 (0) | 0 (0) | 0 (0) |
| **Electrolyte imbalance** | 1 (6) | 0 (0) | 0 (0) | 0 (0) | 0 (0) |
| **Enterococcus test positive** | 1 (6) | 0 (0) | 0 (0) | 0 (0) | 0 (0) |
| **Fluid overload** | 1 (6) | 0 (0) | 0 (0) | 0 (0) | 0 (0) |
| **Fungal test positive** | 0 (0) | 1 (6) | 0 (0) | 0 (0) | 0 (0) |
| **Gastritis hemorrhagic** | 0 (0) | 0 (0) | 1 (6) | 0 (0) | 0 (0) |
| **Gingivitis** | 1 (6) | 0 (0) | 0 (0) | 0 (0) | 0 (0) |
| **Hematoma** | 1 (6) | 0 (0) | 0 (0) | 0 (0) | 0 (0) |
| **Hemoptysis** | 1 (6) | 0 (0) | 0 (0) | 0 (0) | 0 (0) |
| **Hemorrhage intracranial** | 0 (0) | 0 (0) | 0 (0) | 0 (0) | 1 (6) |
| **Hemorrhoids** | 1 (6) | 0 (0) | 0 (0) | 0 (0) | 0 (0) |
| **Head injury** | 1 (6) | 0 (0) | 0 (0) | 0 (0) | 0 (0) |
| **Herpes simplex reactivation** | 0 (0) | 1 (6) | 0 (0) | 0 (0) | 0 (0) |
| **Hyperammonemic encephalopathy** | 0 (0) | 0 (0) | 0 (0) | 1 (6) | 0 (0) |
| **Hyperphosphatemia** | 1 (6) | 0 (0) | 0 (0) | 0 (0) | 0 (0) |
| **Hypertriglyceridemia** | 0 (0) | 0 (0) | 1 (6) | 0 (0) | 0 (0) |
| **Hypoacusis** | 1 (6) | 0 (0) | 0 (0) | 0 (0) | 0 (0) |
| **Hypotension** | 1 (6) | 0 (0) | 0 (0) | 0 (0) | 0 (0) |
| **Impetigo** | 0 (0) | 1 (6) | 0 (0) | 0 (0) | 0 (0) |
| **Lethargy** | 1 (6) | 0 (0) | 0 (0) | 0 (0) | 0 (0) |
| **Leukopenia** | 0 (0) | 0 (0) | 1 (6) | 0 (0) | 0 (0) |
| **Lower respiratory tract infection** | 0 (0) | 1 (6) | 0 (0) | 0 (0) | 0 (0) |
| **Lymphopenia** | 1 (6) | 0 (0) | 0 (0) | 0 (0) | 0 (0) |
| **Malaise** | 0 (0) | 0 (0) | 0 (0) | 1 (6) | 0 (0) |
| **Multiple organ dysfunction syndrome** | 0 (0) | 0 (0) | 0 (0) | 1 (6) | 0 (0) |
| **Musculoskeletal chest pain** | 1 (6) | 0 (0) | 0 (0) | 0 (0) | 0 (0) |
| **N-terminal prohormone brain natriuretic peptide increased** | 0 (0) | 0 (0) | 0 (0) | 1 (6) | 0 (0) |
| **Nasal congestion** | 1 (6) | 0 (0) | 0 (0) | 0 (0) | 0 (0) |
| **Night sweats** | 1 (6) | 0 (0) | 0 (0) | 0 (0) | 0 (0) |
| **Pain in extremity** | 1 (6) | 0 (0) | 0 (0) | 0 (0) | 0 (0) |
| **Pallor** | 1 (6) | 0 (0) | 0 (0) | 0 (0) | 0 (0) |
| **Palmar-plantar erythrodysesthesia syndrome** | 0 (0) | 1 (6) | 0 (0) | 0 (0) | 0 (0) |
| **Peripheral swelling** | 0 (0) | 1 (6) | 0 (0) | 0 (0) | 0 (0) |
| **Petechiae** | 0 (0) | 1 (6) | 0 (0) | 0 (0) | 0 (0) |
| **Pharyngitis** | 0 (0) | 1 (6) | 0 (0) | 0 (0) | 0 (0) |
| **Pleuritic pain** | 1 (6) | 0 (0) | 0 (0) | 0 (0) | 0 (0) |
| **Proctalgia** | 0 (0) | 1 (6) | 0 (0) | 0 (0) | 0 (0) |
| **Rales** | 1 (6) | 0 (0) | 0 (0) | 0 (0) | 0 (0) |
| **Rash maculo-papular** | 1 (6) | 0 (0) | 0 (0) | 0 (0) | 0 (0) |
| **Rectal hemorrhage** | 1 (6) | 0 (0) | 0 (0) | 0 (0) | 0 (0) |
| **Renal failure** | 0 (0) | 0 (0) | 1 (6) | 0 (0) | 0 (0) |
| **Rhinitis** | 0 (0) | 1 (6) | 0 (0) | 0 (0) | 0 (0) |
| **Rhinorrhea** | 1 (6) | 0 (0) | 0 (0) | 0 (0) | 0 (0) |
| **Subdural hemorrhage** | 0 (0) | 1 (6) | 0 (0) | 0 (0) | 0 (0) |
| **Swelling face** | 1 (6) | 0 (0) | 0 (0) | 0 (0) | 0 (0) |
| **Thrombocytopenia** | 0 (0) | 0 (0) | 0 (0) | 1 (6) | 0 (0) |
| **Type 2 diabetes mellitus** | 1 (6) | 0 (0) | 0 (0) | 0 (0) | 0 (0) |
| **Urinary retention** | 1 (6) | 0 (0) | 0 (0) | 0 (0) | 0 (0) |
| **Urinary tract infection** | 0 (0) | 0 (0) | 1 (6) | 0 (0) | 0 (0) |
| **Varicella zoster virus infection** | 0 (0) | 0 (0) | 1 (6) | 0 (0) | 0 (0) |
| **Wheezing** | 0 (0) | 1 (6) | 0 (0) | 0 (0) | 0 (0) |
| **White blood cell count increased** | 0 (0) | 0 (0) | 1 (6) | 0 (0) | 0 (0) |
|  | **120 mg QD AML (n=6)** | | | | |
| **n (%)** | **Grade 1** | **Grade 2** | **Grade 3** | **Grade 4** | **Grade 5** |
| **Any event** | 0 (0) | 0 (0) | 3 (50) | 1 (17) | 2 (33) |
| **Blood bilirubin increased** | 0 (0) | 3 (50) | 0 (0) | 0 (0) | 0 (0) |
| **Diarrhea** | 1 (17) | 0 (0) | 2 (33) | 0 (0) | 0 (0) |
| **Febrile neutropenia** | 0 (0) | 0 (0) | 3 (50) | 0 (0) | 0 (0) |
| **Hyperglycemia** | 1 (17) | 1 (17) | 1 (17) | 0 (0) | 0 (0) |
| **Hypokalemia** | 2 (33) | 1 (17) | 0 (0) | 0 (0) | 0 (0) |
| **International normalized ratio increased** | 3 (50) | 0 (0) | 0 (0) | 0 (0) | 0 (0) |
| **Nausea** | 1 (17) | 2 (33) | 0 (0) | 0 (0) | 0 (0) |
| **Sepsis** | 0 (0) | 0 (0) | 1 (17) | 0 (0) | 2 (33) |
| **Activated partial thromboplastin time prolonged** | 2 (33) | 0 (0) | 0 (0) | 0 (0) | 0 (0) |
| **Chest pain** | 0 (0) | 2 (33) | 0 (0) | 0 (0) | 0 (0) |
| **Confusional state** | 1 (17) | 0 (0) | 1 (17) | 0 (0) | 0 (0) |
| **Edema peripheral** | 2 (33) | 0 (0) | 0 (0) | 0 (0) | 0 (0) |
| **Pneumonia** | 0 (0) | 0 (0) | 2 (33) | 0 (0) | 0 (0) |
| **Pyrexia** | 1 (17) | 1 (17) | 0 (0) | 0 (0) | 0 (0) |
| **Urticaria** | 1 (17) | 1 (17) | 0 (0) | 0 (0) | 0 (0) |
| **Abdominal mass** | 1 (17) | 0 (0) | 0 (0) | 0 (0) | 0 (0) |
| **Abdominal pain** | 0 (0) | 1 (17) | 0 (0) | 0 (0) | 0 (0) |
| **Acidosis** | 1 (17) | 0 (0) | 0 (0) | 0 (0) | 0 (0) |
| **Acute kidney injury** | 0 (0) | 0 (0) | 1 (17) | 0 (0) | 0 (0) |
| **Ageusia** | 1 (17) | 0 (0) | 0 (0) | 0 (0) | 0 (0) |
| **Agitation** | 1 (17) | 0 (0) | 0 (0) | 0 (0) | 0 (0) |
| **Alanine aminotransferase increased** | 1 (17) | 0 (0) | 0 (0) | 0 (0) | 0 (0) |
| **Anaphylactic reaction** | 0 (0) | 0 (0) | 0 (0) | 1 (17) | 0 (0) |
| **Atrial fibrillation** | 0 (0) | 1 (17) | 0 (0) | 0 (0) | 0 (0) |
| **Blood creatinine increased** | 0 (0) | 0 (0) | 1 (17) | 0 (0) | 0 (0) |
| **Burkholderia cepacia complex infection** | 0 (0) | 1 (17) | 0 (0) | 0 (0) | 0 (0) |
| **Cardiac failure** | 0 (0) | 1 (17) | 0 (0) | 0 (0) | 0 (0) |
| **Chest discomfort** | 0 (0) | 1 (17) | 0 (0) | 0 (0) | 0 (0) |
| **Coagulopathy** | 1 (17) | 0 (0) | 0 (0) | 0 (0) | 0 (0) |
| **Colitis** | 1 (17) | 0 (0) | 0 (0) | 0 (0) | 0 (0) |
| **Decreased appetite** | 1 (17) | 0 (0) | 0 (0) | 0 (0) | 0 (0) |
| **Diverticulum** | 1 (17) | 0 (0) | 0 (0) | 0 (0) | 0 (0) |
| **Diverticulum intestinal hemorrhagic** | 1 (17) | 0 (0) | 0 (0) | 0 (0) | 0 (0) |
| **Dizziness** | 0 (0) | 1 (17) | 0 (0) | 0 (0) | 0 (0) |
| **Dysgeusia** | 0 (0) | 1 (17) | 0 (0) | 0 (0) | 0 (0) |
| **Dysphagia** | 0 (0) | 1 (17) | 0 (0) | 0 (0) | 0 (0) |
| **Ejection fraction decreased** | 0 (0) | 0 (0) | 1 (17) | 0 (0) | 0 (0) |
| **Epistaxis** | 0 (0) | 0 (0) | 1 (17) | 0 (0) | 0 (0) |
| **Erythema multiforme** | 1 (17) | 0 (0) | 0 (0) | 0 (0) | 0 (0) |
| **Facial pain** | 0 (0) | 1 (17) | 0 (0) | 0 (0) | 0 (0) |
| **Fall** | 1 (17) | 0 (0) | 0 (0) | 0 (0) | 0 (0) |
| **Fatigue** | 0 (0) | 0 (0) | 1 (17) | 0 (0) | 0 (0) |
| **Folliculitis** | 1 (17) | 0 (0) | 0 (0) | 0 (0) | 0 (0) |
| **Hypercalciuria** | 0 (0) | 1 (17) | 0 (0) | 0 (0) | 0 (0) |
| **Hypocalcemia** | 0 (0) | 0 (0) | 1 (17) | 0 (0) | 0 (0) |
| **Hypophosphatemia** | 0 (0) | 0 (0) | 1 (17) | 0 (0) | 0 (0) |
| **Hypotension** | 0 (0) | 1 (17) | 0 (0) | 0 (0) | 0 (0) |
| **Insomnia** | 1 (17) | 0 (0) | 0 (0) | 0 (0) | 0 (0) |
| **Jaundice** | 1 (17) | 0 (0) | 0 (0) | 0 (0) | 0 (0) |
| **Joint range of motion decreased** | 1 (17) | 0 (0) | 0 (0) | 0 (0) | 0 (0) |
| **Malaise** | 1 (17) | 0 (0) | 0 (0) | 0 (0) | 0 (0) |
| **Mental status changes** | 1 (17) | 0 (0) | 0 (0) | 0 (0) | 0 (0) |
| **Mouth ulceration** | 0 (0) | 0 (0) | 0 (0) | 1 (17) | 0 (0) |
| **Non-cardiac chest pain** | 0 (0) | 1 (17) | 0 (0) | 0 (0) | 0 (0) |
| **Oral blood blister** | 1 (17) | 0 (0) | 0 (0) | 0 (0) | 0 (0) |
| **Paresthesia** | 1 (17) | 0 (0) | 0 (0) | 0 (0) | 0 (0) |
| **Periorbital hemorrhage** | 1 (17) | 0 (0) | 0 (0) | 0 (0) | 0 (0) |
| **Petechiae** | 1 (17) | 0 (0) | 0 (0) | 0 (0) | 0 (0) |
| **Rectal hemorrhage** | 0 (0) | 0 (0) | 1 (17) | 0 (0) | 0 (0) |
| **Retching** | 1 (17) | 0 (0) | 0 (0) | 0 (0) | 0 (0) |
| **Skin mass** | 1 (17) | 0 (0) | 0 (0) | 0 (0) | 0 (0) |
| **Starvation ketoacidosis** | 0 (0) | 0 (0) | 0 (0) | 1 (17) | 0 (0) |
| **Stomatitis** | 1 (17) | 0 (0) | 0 (0) | 0 (0) | 0 (0) |
| **Taste disorder** | 1 (17) | 0 (0) | 0 (0) | 0 (0) | 0 (0) |
| **Tremor** | 1 (17) | 0 (0) | 0 (0) | 0 (0) | 0 (0) |
| **Troponin I increased** | 1 (17) | 0 (0) | 0 (0) | 0 (0) | 0 (0) |
| **Urinary tract infection** | 0 (0) | 1 (17) | 0 (0) | 0 (0) | 0 (0) |
| **Vomiting** | 0 (0) | 1 (17) | 0 (0) | 0 (0) | 0 (0) |

aOne patient was listed in a separate 80 mg QD cohort due to a change in the electronic case report form data capture
AML, acute myeloid leukemia; MM, multiple myeloma; NHL, non-Hodgkin lymphoma; QD, once daily.

### Supplementary Table S5. Overview of clinical responses in patients receiving molibresib (Part 1; 60–120 mg QD doses).

|  | **Part 1** | | | | | | | | |
| --- | --- | --- | --- | --- | --- | --- | --- | --- | --- |
| **n, %** | **60 mg QD AML (n=8)** | **60 mg QD NHL (n=18)** | **60 mg QD MM  (n=3)** | **75 mg QD AML (n=8)** | **80 mg QDa (n=1)** | **80 mg QD AML (n=7)** | **80 mg QD NHL (n=7)** | **100 mg QD AML  (n=16)** | **120 mg QD AML  (n=6)** |
| **ORR, % (95% CI)** | 25  (3.2–65.1) | 6 (0.1–27.3) | 0 | 0 | 0 | 14 (0.4–57.9) | 29 (3.7–71.0) | 13 (1.6–38.3) | 17 (0.4–64.1) |
| **Best response, n (%)b** |  |  |  |  |  |  |  |  |  |
| CR | 0 | 0 | 0 | 0 | 0 | 0 | 1 (14) | 0 | 0 |
| CRi/CRp | 0 | 0 | 0 | 0 | 0 | 0 | 0 | 1 (6) | 1 (17) |
| PR | 2 (25) | 1 (6) | 0 | 0 | 0 | 1 (14) | 1 (14) | 1 (6) | 0 |
| SD | 0 | 3 (17) | 1 (33) | 0 | 0 | 0 | 1 (14) | 0 | 0 |
| PD | 0 | 11 (61) | 2 (67) | 0 | 0 | 0 | 4 (57) | 0 | 0 |
| Not evaluablec | 6 (75) | 3 (17) | 0 | 1 (13) | 1 (100) | 3 (43) | 0 | 3 (19) | 3 (50) |
| No response | 0 | 0 | 0 | 7 (88) | 0 | 3 (43) | 0 | 11 (69) | 2 (33) |

aOne patient was listed in a separate 80 mg QD cohort due to a change in the electronic case report form data capture; **b**Unconfirmed best overall responses are reported for AML and MM cohorts and confirmed (duration at least 4 months) best overall responses reported for NHL cohorts; cPatients with unknown/not evaluable or missing best overall response data are assumed to be non-responders and are included in the denominator for percentage calculation.

AML, acute myeloid leukemia; CI, confidence interval; CR, complete response; CRi, CR but platelet count <100 x 109/L or neutrophil count <1 x 109/L; CRp, CR but platelet count <100 x 109/L; MM, multiple myeloma; NHL, non-Hodgkin lymphoma; ORR, objective response rate; PD, progressive disease; PR, partial response; QD, once daily; SD, stable disease.

### Supplementary Table S6. Summary of derived PK parameters (Part 1 [60–120 mg QD doses] and Part 2).

|  | **Part 1** | | | | | | | | |
| --- | --- | --- | --- | --- | --- | --- | --- | --- | --- |
|  | **60 mg QD AML** | **60 mg QD NHL** | **60 mg QD MM** | **75 mg QD AML** | **80 mg QDa** | **80 mg QD AML** | **80 mg QD NHL** | **100 mg QD AML** | **120 mg QD AML** |
| **Molibresib** | | | | | | | | | | |
| Cmax, geometric mean (%CVb), ng/ml | n=8 | n=18 | n=3 | n=8 | n=1 | n=6 | n=7 | n=16 | n=6 |
| Single doseb | 853 (31.0) | 1159 (28.6) | 814 (27.9) | 1729 (35.4) | 1248 (–) | 1444 (29.9) | 1074 (38.5) | 2336 (23.1) | 1793 (42.2) |
| Repeat dosec | n=3  1070  (37.3) | n=11  1179 (28.1) | n=2  513 (48.4) | n=7  1384 (35.4) | n=1  1753  (–) | n=6  1314 (58.6) | n=4  725 (46.8) | n=11  1587 (50.8) | n=2  921 (52.2) |
| AUC0–24, geometric mean (%CVb), h·ng/ml | n=8 | n=18 | n=3 | n=8 | n=1 | n=6 | n=7 | n=16 | n=6 |
| Single doseb | 6425 (22.4) | 5919 (52.9) | 3695 (62.0) | 7981 (45.3) | 5945 (–) | 8395 (34.3) | 5018 (44.2) | 13521 (46.3) | 13689 (43.8) |
| Repeat dosec | n=3  6271 (38.8) | n=11  3576 (30.6) | n=2  931  (53.6) | n=7  5884 (48.5) | n=1  5188 (–) | n=6  6893 (72.0) | n=4  2994 (37.3) | n=11  9441 (84.1) | n=2  5296  (8.9) |
| **Active metabolite composite** | | | | | | | | | | |
| Cmax, geometric mean (%CVb), ng/ml |  | n=15 | n=3 | n=8 |  |  | n=7 | n=16 |  |
| Single doseb | – | 240 (26.8) | 361 (54.8) | 252 (49.7) | – | – | 325 (47.2) | 201 (56.9) | – |
| Repeat dosec | – | n=11  454 (34.1) | n=2  501 (22.8) | n=7  445 (52.0) | – | – | n=4  371 (35.2) | n=11  558 (31.8) | – |
| AUC0–24, geometric mean (%CVb), h·ng/ml |  | n=15 | n=2 | n=8 |  |  | n=6 | n=15 |  |
| Single doseb | – | 3048 (22.9) | 3298 (68.3) | 3174 (40.6) | – | – | 3433 (39.8) | 2902 (52.3) | – |
| Repeat dosec | – | n=9  4870 (46.2) | n=2  3838 (37.2) | n=7  5313 (45.3) | – | – | n=4  3380 (44.2) | n=10  8535 (43.9) | – |
| **Total active moiety** | | | | | | | | | | |
| Cmax, geometric mean (%CVb), nM/L |  | n=15 | n=3 | n=8 |  |  | n=7 | n=16 |  |
| Single doseb | – | 3272 (24.1) | 2520 (24.9) | 4710 (27.7) | – | – | 3225 (41.4) | 5920 (20.2) | – |
| Repeat dosec | – | n=9  3826 (24.6) | n=2  2417 (31.9) | n=7  4246 (27.6) | – | – | n=4  2574 (36.1) | n=11  5132 (37.4) | – |
| AUC0–24, geometric mean (%CVb), h·nM/L |  | n=15 | n=2 | n=8 |  |  | n=7 | n=16 |  |
| Single doseb | – | 22103 (28.8) | 23911 (22.6) | 28420 (27.2) | – | – | 21080 (32.1) | 41146 (35.1) | – |
| Repeat dosec | – | n=9  21554 (34.3) | n=2  11153 (38.2) | n=7  29663 (22.7) | – | – | n=4  16206 (24.2) | n=11  47093 (52.8) | – |

aOne patient was listed in a separate 80 mg QD cohort due to a change in the electronic case report form data capture; bWeek 1 Day 1; cPart 1: Week 2 Day 7; Part 2: Week 3 Day 1 to Week 4 Day 1 (except for one patient whose second assessment was Week 2 Day 6)

%CVb, coefficient of variability; AML, acute myeloid leukemia; AUC0–24, area under the concentration-time curve; Cmax, time to maximum plasma concentration; MM, multiple myeloma; NHL, non-Hodgkin lymphoma; QD, once daily; SD, standard deviation.

### Supplementary Table S7. Timings of BMA sample collections.

| **Differential Analysis** | | | |
| --- | --- | --- | --- |
| **Patient** | **Dose** | **Blast %** | **Time point** |
| 1 (CRp) | 120 mg | 72  81 | Screening  W1D3 |
| 2 (CR) | 100 mg | 88  73  17 | Screening  W1D7  W10 (response) |
| 3 (PR) | 80 mg | 56  10 | Screening  W3 |
| 4 (PR) | 100 mg | 28  8 | Screening  W4 |
| 5 (PR) |  | 68 | Screening |
|  | 64 | W1D5 |
| 60 mg | 81 | W4 |
|  | 35 | W7 (response) |
|  | 36 | W17 (relapse) |
| 6 (PR) | 60 mg | 34 | Screening |
| 33 | W4 |
| 28 | W10 |
| 13 | W15 |
| 7 | 80 mg | 29 | Screening |
| 59 | W1D3 |
| 8 | 120 mg | 88  86 | Screening  W1D3 |
| 9 | 100 mg | 20 | Screening |
| 15 | W1D4 |
| 10 | 120 mg | 90  57 | Screening  W1D3 |
| 11 | 120 mg | 90  98 | Screening  W1D5 |
| 12 | 120 mg | 97  97 | Screening  W1D4 |
| 13 | 120 mg | 90 | Screening |
| 93 | W1D5 |

BMA, bone marrow aspirate; CR, complete response; CRp, CR with a platelet count <100 x 109/L; D, Day; ID, identification number; PR, partial response; screen, Screening; W, Week.

### Supplementary Table S8. Transcriptional changes by dose level for the seven-gene RT-qPCR panel (15 patients with AML; Part 1).

| **Molibresib dose** | **Patient** | **log2-fold change** | | | | | | |
| --- | --- | --- | --- | --- | --- | --- | --- | --- |
| ***PLD6*** | ***SLA*** | ***NFE2*** | ***GPR183*** | ***CCR2*** | ***MYC*** | ***SERTAD1*** |
| 60 mg QD | 14 | 0.13 | 0.85 | -0.08 | 0.09 | 0.44 | 0.26 | 0.08 |
| 5 | -1.51 | -0.51 | 0.06 | -0.38 | -1.45 | -0.53 | 1.75 |
| 6 | -0.86 | -0.21 | -0.09 | 0.44 | -1.14 | -1.33 | 2.62 |
| 80 mg QD | 15 | -1.3 | 0.87 | -0.1 | 0.82 | 1.27 | 0.05 | 0.91 |
| 16 | -0.15 | 0.7 | -0.1 | 0.11 | -0.16 | -0.27 | 1 |
| 17 | 0.35 | -0.14 | -0.78 | -0.14 | -1.63 | -0.93 | 1.68 |
| 7 | -1.77 | -0.82 | -0.84 | -1.33 | -2.68 | -1.01 | 1.95 |
| 100 mg QD | 9 | -1.56 | -0.34 | -0.66 | -0.57 | -2.61 | -1.43 | 1.6 |
| 18 | -2.36 | -1.34 | -0.74 | -2.14 | -2.02 | -1.68 | 1.59 |
| 13 | -3.86 | -1.94 | -1.1 | -1.6 | -4.4 | -2.54 | 1.72 |
| 120 mg QD | 8 | -0.57 | 0.9 | 0.54 | 1.81 | -0.5 | -0.08 | -1.21 |
| 1 | -1.73 | -0.3 | -1.35 | 0.88 | -0.37 | -0.85 | 0.17 |
| 10 | -2.61 | 0.03 | -0.41 | -2.83 | -3.69 | -2.41 | 1.51 |
| 12 | -3.17 | -1.05 | -1.87 | -0.66 | -0.95 | -3.27 | 0.87 |
| 11 | -1.64 | -2.07 | -0.34 | 1.42 | -2.75 | -3.72 | 3.21 |

AML, acute myeloid leukemia; QD, once daily; RT-qPCR, reverse transcription and quantitative polymerase chain reaction.
